# Supplementary material
Source: MDPI journal article supplement (https://www.mdpi.com/1424-2818/14/4/234)
Supplement: s1 [file s1]

**Supplementary Table S1.** List of samples collected for the Global Genome Initiative for Gardens projects selected for DNA barcoding, with GenBank accession numbers and genomic voucher identification numbers. All the sequences are included in the GGI-Gardens BioProjects [PRJNA791936](#) and [PRJNA485943](#) in GenBank and BOLD projects GRDTX and GRDMO. Each Collector Number includes a link to the digital genomic voucher record stored in the Smithsonian Biorepository.

| NMNH<br>Biorepository Tissue<br>ID | Collector<br>Number        | Family         | Genus                  | Species               | rbcL     | matK     | psbA-<br>trnH | ITS      |
|------------------------------------|----------------------------|----------------|------------------------|-----------------------|----------|----------|---------------|----------|
| AG2KL47                            | <a href="#">Gostel 456</a> | Acanthaceae    | <i>Yeatesia</i>        | <i>platystegia</i>    | OL537796 | OL537985 | OK469591      | OL537519 |
| AM2SX67                            | <a href="#">Gostel 535</a> | Acanthaceae    | <i>Tetramerium</i>     | <i>sp.</i>            | OL537770 |          | OK469501      | OL537495 |
| AM2SW30                            | <a href="#">Gostel 495</a> | Acanthaceae    | <i>Anisacanthus</i>    | <i>quadrifidus</i>    | OL537532 |          | OK469491      | OL537299 |
| AM2SY17                            | <a href="#">Gostel 585</a> | Acanthaceae    | <i>Jacobinia</i>       | <i>chrysostephana</i> | OL537665 | OL537894 | OK469462      |          |
| AM2SX48                            | <a href="#">Gostel 516</a> | Acanthaceae    | <i>Elytraria</i>       | <i>caroliniensis</i>  | OL537625 | OL537864 | OK469527      | OL537373 |
| AG2KU19                            | <a href="#">Gostel 408</a> | Acanthaceae    | <i>Dyschoriste</i>     | <i>linearis</i>       | OL537620 | OL537861 | OK469597      |          |
| AM2SW32                            | <a href="#">Gostel 496</a> | Adiantaceae    | <i>Hemionitis</i>      | <i>arifolium</i>      | OL537655 |          |               |          |
| AM2SX71                            | <a href="#">Gostel 539</a> | Aizoaceae      | <i>Chasmatophyllum</i> | <i>musculinum</i>     | OL537589 |          | OK469536      | OL537345 |
| AM2SY92                            | <a href="#">Gostel 646</a> | Amaranthaceae  | <i>Froelichia</i>      | <i>gracilis</i>       | OL537640 |          | OK469423      | OL537387 |
| AM2SX91                            | <a href="#">Gostel 559</a> | Amaryllidaceae | <i>Griffinia</i>       | <i>sp.</i>            | OL537649 | OL537882 | OK469499      | OL537395 |
| AM2SX66                            | <a href="#">Gostel 534</a> | Amaryllidaceae | <i>Sprekelia</i>       | <i>formosissimus</i>  | OL537761 |          | OK469509      | OL537486 |
| AG2KT68                            | <a href="#">Gostel 384</a> | Amaryllidaceae | <i>Nothoscordum</i>    | <i>bivalve</i>        | OL537710 | OL537927 | OK469600      | OL537440 |
| AM2SY09                            | <a href="#">Gostel 577</a> | Apiaceae       | <i>Chaerophyllum</i>   | <i>tainturieri</i>    | OL537586 | OL537841 | OK469472      | OL537342 |
| AM2SY10                            | <a href="#">Gostel 578</a> | Apiaceae       | <i>Limnoscium</i>      | <i>pumilum</i>        | OL537676 | OL537902 | OK469454      | OL537417 |
| AG2KT58                            | <a href="#">Gostel 379</a> | Apiaceae       | <i>Cyclospermum</i>    | <i>sp.</i>            | OL537603 | OL537851 | OK469570      | OL537358 |
| AG2KU81                            | <a href="#">Gostel 439</a> | Apiaceae       | <i>Bifora</i>          | <i>americana</i>      | OL537565 |          | OK469604      | OL537326 |
| AG2KU47                            | <a href="#">Gostel 422</a> | Apocynaceae    | <i>Asclepias</i>       | <i>tuberosum</i>      | OL537538 | OL537808 | OK469616      | OL537304 |
| AG2KU77                            | <a href="#">Gostel 437</a> | Apocynaceae    | <i>Matelea</i>         | <i>biflora</i>        | OL537688 | OL537910 | OK469623      |          |
| AM2SX83                            | <a href="#">Gostel 551</a> | Araceae        | <i>Remusatia</i>       | <i>vivipara</i>       | OL537737 | OL537944 | OK469500      | OL537462 |
| AG2KU53                            | <a href="#">Gostel 425</a> | Araceae        | <i>Dracunculus</i>     | <i>vulgaris</i>       | OL537619 | OL537860 | OK469585      | OL537369 |

|         |                            |              |                         |                      |          |          |          |          |
|---------|----------------------------|--------------|-------------------------|----------------------|----------|----------|----------|----------|
| AM2SX79 | <a href="#">Gostel 547</a> | Araliaceae   | <i>Metapanax</i>        | <i>sp.</i>           | OL537695 | OL537917 | OK469535 | OL537431 |
| AM2SY16 | <a href="#">Gostel 584</a> | Arecaceae    | <i>Butia</i>            | <i>capitata</i>      | OL537574 |          | OK469471 |          |
| AM2SW62 | <a href="#">Gostel 513</a> | Arecaceae    | <i>Guihaia</i>          | <i>argyrata</i>      | OL537650 | OL537883 | OK469489 |          |
| AM2SW36 | <a href="#">Gostel 498</a> | Arecaceae    | <i>Trachycarpus</i>     | <i>fortunei</i>      | OL537778 |          |          |          |
| AM2SW44 | <a href="#">Gostel 504</a> | Arecaceae    | <i>Trithrinax</i>       | <i>campestris</i>    | OL537782 |          |          |          |
| AG2KR74 | <a href="#">Gostel 502</a> | Arecaceae    | <i>Nannorrhops</i>      | <i>ritchieana</i>    | OL537702 |          |          | OL537436 |
| AM2SX63 | <a href="#">Gostel 531</a> | Arecaceae    | <i>Brahea</i>           | <i>moorei</i>        | OL537573 |          | OK469537 |          |
| AM2SX70 | <a href="#">Gostel 538</a> | Asparagaceae | <i>Beschorneria</i>     | <i>rigida</i>        | OL537564 |          | OK469545 | OL537325 |
| AM2SY71 | <a href="#">Gostel 629</a> | Asparagaceae | <i>Dasyllirion</i>      | <i>leiophyllum</i>   | OL537608 | OL537853 | OK469435 | OL537361 |
| AG2KU43 | <a href="#">Gostel 420</a> | Asparagaceae | <i>Aspidistra</i>       | <i>elator</i>        | OL537539 | OL537809 | OK469554 |          |
| AM2SW42 | <a href="#">Gostel 503</a> | Asparagaceae | <i>Calibanus</i>        | <i>hookeri</i>       | OL537576 | OL537833 | OK469505 |          |
| AO7RU79 | <a href="#">Gostel 802</a> | Asteraceae   | <i>Solidago</i>         | <i>sp.</i>           | OL537757 | OL537957 | OK469413 | OL537482 |
| AG2KU67 | <a href="#">Gostel 432</a> | Asteraceae   | <i>Lygodesmia</i>       | <i>texana</i>        | OL537681 | OL537907 | OK469594 | OL537421 |
| AO7RU80 | <a href="#">Gostel 803</a> | Asteraceae   | <i>Achillea</i>         | <i>millefolium</i>   | OL537524 | OL537800 | OK469412 | OL537294 |
| AM2SX73 | <a href="#">Gostel 541</a> | Asteraceae   | <i>Bigelowia</i>        | <i>nuttallii</i>     | OL537566 |          | OK469516 | OL537327 |
| AM2SY46 | <a href="#">Gostel 606</a> | Asteraceae   | <i>Thymophylla</i>      | <i>pentachaeta</i>   | OL537776 | OL537972 | OK469480 | OL537502 |
| AM2SY64 | <a href="#">Gostel 624</a> | Asteraceae   | <i>Pseudognaphalium</i> | <i>sp.</i>           | OL537733 |          | OK469478 | OL537459 |
| AM2SY77 | <a href="#">Gostel 632</a> | Asteraceae   | <i>Thelesperma</i>      | <i>megapotamicum</i> |          |          | OK469477 | OL537500 |
| AG2KU57 | <a href="#">Gostel 427</a> | Asteraceae   | <i>Gaillardia</i>       | <i>pulchella</i>     | OL537641 | OL537876 | OK469564 | OL537388 |
| AO7RU83 | <a href="#">Gostel 807</a> | Asteraceae   | <i>Eupatorieae</i>      | <i>sp.</i>           | OL537540 | OL537810 | OK469409 | OL537305 |
| AG2KV57 | <a href="#">Gostel 481</a> | Asteraceae   | <i>Parthenium</i>       | <i>incisum</i>       | OL537718 | OL537933 | OK469493 | OL537447 |
| AG2KV53 | <a href="#">Gostel 479</a> | Asteraceae   | <i>Tetragonotheca</i>   | <i>texana</i>        | OL537769 | OL537967 | OK469506 | OL537494 |
| AM2SY65 | <a href="#">Gostel 625</a> | Asteraceae   | <i>Trixis</i>           | <i>inula</i>         | OL537784 | OL537976 | OK469467 | OL537507 |
| AO7RU84 | <a href="#">Gostel 808</a> | Asteraceae   | <i>Solidago</i>         | <i>sp.</i>           | OL537758 | OL537958 | OK469408 | OL537483 |
| AO7RU85 | <a href="#">Gostel 810</a> | Asteraceae   | <i>Berlandiera</i>      | <i>lyrata</i>        | OL537563 | OL537829 | OK469407 | OL537324 |
| AG2KV63 | <a href="#">Gostel 484</a> | Asteraceae   | <i>Centaurea</i>        | <i>melitensis</i>    | OL537584 | OL537839 | OK469531 | OL537340 |
| AG2KT46 | <a href="#">Gostel 373</a> | Asteraceae   | <i>Lindheimera</i>      | <i>texana</i>        | OL537677 | OL537903 | OK469456 | OL537418 |
| AO7RU86 | <a href="#">Gostel 812</a> | Asteraceae   | <i>Thymophylla</i>      | <i>acerosa</i>       | OL537775 | OL537971 | OK469406 | OL537501 |

|         |                            |            |                     |                     |          |          |          |          |
|---------|----------------------------|------------|---------------------|---------------------|----------|----------|----------|----------|
| AG2KU79 | <a href="#">Gostel 438</a> | Asteraceae | <i>Thelesperma</i>  | <i>filiformis</i>   | OL537774 | OL537970 | OK469614 | OL537499 |
| AM2SY50 | <a href="#">Gostel 610</a> | Asteraceae | <i>Xanthisma</i>    | <i>spinulosum</i>   | OL537795 | OL537984 |          | OL537518 |
| AM2SY66 | <a href="#">Gostel 626</a> | Asteraceae | <i>Xanthisma</i>    | <i>gracile</i>      | OL537794 | OL537983 | OK469459 | OL537517 |
| AM2SY88 | <a href="#">Gostel 642</a> | Asteraceae | <i>Solidago</i>     | <i>sp.</i>          | OL537759 | OL537959 | OK469457 | OL537484 |
| AG2KU27 | <a href="#">Gostel 412</a> | Asteraceae | <i>Calypocarpus</i> | <i>vialis</i>       | OL537577 | OL537834 | OK469555 | OL537333 |
| AM2SW50 | <a href="#">Gostel 507</a> | Asteraceae | <i>Farfugium</i>    | <i>japonicum</i>    | OL537632 | OL537868 | OK469539 | OL537380 |
| AO7RU92 | <a href="#">Gostel 821</a> | Asteraceae | <i>Trixis</i>       | <i>californica</i>  | OL537783 | OL537975 | OK469400 | OL537506 |
| AG2KU61 | <a href="#">Gostel 429</a> | Asteraceae | <i>Hymenopappus</i> | <i>tenuifolius</i>  |          | OL537891 | OK469624 | OL537401 |
| AG2KU75 | <a href="#">Gostel 436</a> | Asteraceae | <i>Diaperia</i>     | <i>verna</i>        | OL537613 | OL537856 | OK469552 | OL537365 |
| AO7RU93 | <a href="#">Gostel 825</a> | Asteraceae | <i>Zinnia</i>       | <i>acerosa</i>      | OL537798 | OL537987 | OK469399 | OL537521 |
| AN6GL55 | <a href="#">Gostel 826</a> | Asteraceae | <i>Melampodium</i>  | <i>leucanthum</i>   | OL537691 | OL537913 | OK469398 | OL537427 |
| AM2SY51 | <a href="#">Gostel 611</a> | Asteraceae | <i>Jefea</i>        | <i>brevifolia</i>   | OL537667 | OL537896 | OK469451 | OL537408 |
| AG2KU15 | <a href="#">Gostel 406</a> | Asteraceae | <i>Achillea</i>     | <i>millefolium</i>  | OL537525 | OL537801 | OK469617 | OL537295 |
| AG2KV21 | <a href="#">Gostel 463</a> | Asteraceae | <i>Heterotheca</i>  | <i>canescens</i>    | OL537658 | OL537888 | OK469602 | OL537399 |
| AG2KU93 | <a href="#">Gostel 445</a> | Asteraceae | <i>Arnoglossum</i>  | <i>plantagineum</i> | OL537537 | OL537807 | OK469622 | OL537303 |
| AM2SY81 | <a href="#">Gostel 635</a> | Asteraceae | <i>Packera</i>      | <i>millelobata</i>  | OL537714 | OL537929 | OK469449 | OL537444 |
| AM2SY89 | <a href="#">Gostel 643</a> | Asteraceae | <i>Solidago</i>     | <i>juliae</i>       | OL537756 |          | OK469448 | OL537481 |
| AM2SY04 | <a href="#">Gostel 572</a> | Asteraceae | <i>Vigethia</i>     | <i>mexicana</i>     | OL537789 | OL537980 | OK469446 | OL537512 |
| AM2SX89 | <a href="#">Gostel 557</a> | Asteraceae | <i>Palafoxia</i>    | <i>hookeriana</i>   | OL537715 | OL537930 | OK469515 | OL537445 |
| AM2SY52 | <a href="#">Gostel 612</a> | Asteraceae | <i>Sidneya</i>      | <i>tenuifolia</i>   | OL537754 | OL537956 | OK469443 | OL537480 |
| AM2SY69 | <a href="#">Gostel 628</a> | Asteraceae | <i>Acourtia</i>     | <i>wrightii</i>     | OL537526 | OL537802 | OK469442 | OL537296 |
| AM2SY90 | <a href="#">Gostel 644</a> | Asteraceae | <i>Flaveria</i>     | <i>sp.</i>          | OL537633 | OL537869 |          |          |
| AM2SY05 | <a href="#">Gostel 573</a> | Asteraceae | <i>Borrchia</i>     | <i>sp.</i>          | OL537568 |          | OK469439 | OL537328 |
| AG2KU83 | <a href="#">Gostel 440</a> | Asteraceae | <i>Pyrrhopappus</i> | <i>pauciflora</i>   | OL537735 | OL537943 | OK469593 | OL537461 |
| AG2KT50 | <a href="#">Gostel 375</a> | Asteraceae | <i>Chaetopappa</i>  | <i>asteroides</i>   | OL537588 | OL537843 | OK469611 | OL537344 |
| AM2SY53 | <a href="#">Gostel 613</a> | Asteraceae | <i>Parthenium</i>   | <i>sp.</i>          | OL537717 | OL537932 | OK469436 | OL537446 |
| AG2KL41 | <a href="#">Gostel 459</a> | Asteraceae | <i>Chrysactinia</i> | <i>mexicana</i>     | OL537591 | OL537844 | OK469560 | OL537347 |
| AG2KU97 | <a href="#">Gostel 447</a> | Asteraceae | <i>Dysodiopsis</i>  | <i>tagetoides</i>   | OL537622 | OL537863 |          |          |

|         |                            |             |                      |                       |          |          |          |          |
|---------|----------------------------|-------------|----------------------|-----------------------|----------|----------|----------|----------|
| AG2KU00 | <a href="#">Gostel 493</a> | Asteraceae  | <i>Dysodiopsis</i>   | <i>tagetoides</i>     | OL537621 | OL537862 | OK469520 | OL537370 |
| AM2SY06 | <a href="#">Gostel 574</a> | Asteraceae  | <i>Arnoglossum</i>   | <i>ovatum</i>         | OL537536 | OL537806 | OK469432 | OL537302 |
| AG2KU49 | <a href="#">Gostel 423</a> | Asteraceae  | <i>Coreopsis</i>     | <i>lanceolata</i>     | OL537597 | OL537848 | OK469606 | OL537352 |
| AM2SY49 | <a href="#">Gostel 609</a> | Asteraceae  | <i>Baccharis</i>     | <i>salicina</i>       | OL537543 | OL537812 | OK469429 | OL537307 |
| AM2SY54 | <a href="#">Gostel 614</a> | Asteraceae  | <i>Hymenothrix</i>   | <i>pedata</i>         | OL537661 | OL537892 | OK469427 | OL537402 |
| AG2KU65 | <a href="#">Gostel 431</a> | Asteraceae  | <i>Vernonia</i>      | <i>baldwinii</i>      | OL537787 | OL537978 | OK469605 | OL537510 |
| AG2KV47 | <a href="#">Gostel 476</a> | Asteraceae  | <i>Vernonia</i>      | <i>sp.</i>            | OL537788 | OL537979 | OK469541 | OL537511 |
| AM2SY73 | <a href="#">Gostel 630</a> | Asteraceae  | <i>Senecio</i>       | <i>flaccidus</i>      | OL537750 | OL537952 | OK469425 | OL537476 |
| AG2KT56 | <a href="#">Gostel 378</a> | Asteraceae  | <i>Tetraneuris</i>   | <i>scaposa</i>        | OL537771 | OL537968 | OK469580 | OL537496 |
| AG2KV51 | <a href="#">Gostel 478</a> | Asteraceae  | <i>Psilostrophe</i>  | <i>tagetina</i>       | OL537734 | OL537942 | OK469513 | OL537460 |
| AG2KV35 | <a href="#">Gostel 470</a> | Asteraceae  | <i>Chaetopappa</i>   | <i>asteroides</i>     | OL537587 | OL537842 | OK469522 | OL537343 |
| AM2SX60 | <a href="#">Gostel 528</a> | Asteraceae  | <i>Tagetes</i>       | <i>lemmonii</i>       | OL537767 | OL537965 | OK469496 | OL537492 |
| AM2SY48 | <a href="#">Gostel 608</a> | Asteraceae  | <i>Baileya</i>       | <i>multiradiata</i>   | OL537544 | OL537813 | OK469419 | OL537308 |
| AM2SY55 | <a href="#">Gostel 615</a> | Asteraceae  | <i>Melampodium</i>   | <i>leucanthum</i>     | OL537690 | OL537912 | OK469418 | OL537426 |
| AM2SY93 | <a href="#">Gostel 647</a> | Asteraceae  | <i>Symphotrichum</i> | <i>sp.</i>            | OL537766 | OL537964 | OK469414 | OL537491 |
| AG2KU11 | <a href="#">Gostel 404</a> | Asteraceae  | <i>Wedelia</i>       | <i>acapulcensis</i>   | OL537792 | OL537982 | OK469556 | OL537515 |
| AG2KT78 | <a href="#">Gostel 389</a> | Begoniaceae | <i>Begonia</i>       | <i>heracleifolia</i>  | OL537548 | OL537816 |          | OL537311 |
| AG2KT92 | <a href="#">Gostel 396</a> | Begoniaceae | <i>Begonia</i>       | <i>glabra</i>         | OL537547 | OL537815 | OK469557 | OL537310 |
| AG2KT86 | <a href="#">Gostel 393</a> | Begoniaceae | <i>Begonia</i>       | <i>cristobalensis</i> | OL537545 |          |          |          |
| AG2KT88 | <a href="#">Gostel 394</a> | Begoniaceae | <i>Begonia</i>       | <i>peltata</i>        | OL537552 | OL537820 | OK469578 | OL537314 |
| AG2KT80 | <a href="#">Gostel 390</a> | Begoniaceae | <i>Begonia</i>       | <i>lanceolata</i>     | OL537549 | OL537817 | OK469619 | OL537312 |
| AG2KT94 | <a href="#">Gostel 397</a> | Begoniaceae | <i>Begonia</i>       | <i>epipsila</i>       | OL537546 | OL537814 | OK469627 | OL537309 |
| AG2KT84 | <a href="#">Gostel 392</a> | Begoniaceae | <i>Begonia</i>       | <i>sikkimensis</i>    | OL537556 | OL537824 | OK469599 |          |
| AG2KU35 | <a href="#">Gostel 416</a> | Begoniaceae | <i>Begonia</i>       | <i>lunaris</i>        | OL537550 | OL537818 | OK469596 | OL537313 |
| AG2KT96 | <a href="#">Gostel 398</a> | Begoniaceae | <i>Begonia</i>       | <i>sanguinea</i>      | OL537554 | OL537822 | OK469618 | OL537316 |
| AG2KT74 | <a href="#">Gostel 387</a> | Begoniaceae | <i>Begonia</i>       | <i>venosa</i>         | OL537559 | OL537827 | OK469569 | OL537320 |
| AG2KT76 | <a href="#">Gostel 388</a> | Begoniaceae | <i>Begonia</i>       | <i>thiemei</i>        | OL537558 | OL537826 | OK469558 | OL537319 |
| AG2KT82 | <a href="#">Gostel 391</a> | Begoniaceae | <i>Begonia</i>       | <i>sericoneura</i>    | OL537555 | OL537823 | OK469609 | OL537317 |

|         |                            |                |                       |                      |          |          |          |          |
|---------|----------------------------|----------------|-----------------------|----------------------|----------|----------|----------|----------|
| AG2KT90 | <a href="#">Gostel 395</a> | Begoniaceae    | <i>Begonia</i>        | <i>reniformis</i>    | OL537553 | OL537821 | OK469568 | OL537315 |
| AG2KU39 | <a href="#">Gostel 418</a> | Begoniaceae    | <i>Begonia</i>        | <i>vittariifolia</i> | OL537560 | OL537828 | OK469576 | OL537321 |
| AG2KU41 | <a href="#">Gostel 419</a> | Begoniaceae    | <i>Begonia</i>        | <i>sykakiengii</i>   | OL537557 | OL537825 | OK469565 | OL537318 |
| AG2KU37 | <a href="#">Gostel 417</a> | Begoniaceae    | <i>Begonia</i>        | <i>maculata</i>      | OL537551 | OL537819 | OK469586 |          |
| AG2KT62 | <a href="#">Gostel 381</a> | Berberidaceae  | <i>Berberis</i>       | <i>trifoliolata</i>  | OL537562 |          | OK469396 | OL537323 |
| AM2SX62 | <a href="#">Gostel 530</a> | Berberidaceae  | <i>Berberis</i>       | <i>chochoco</i>      | OL537561 |          |          | OL537322 |
| AM2SW56 | <a href="#">Gostel 510</a> | Berberidaceae  | <i>Mahonia</i>        | <i>sp.</i>           | OL537686 |          |          | OL537424 |
| AM2SX95 | <a href="#">Gostel 563</a> | Bignoniaceae   | <i>Phyllarthron</i>   | <i>bernierianum</i>  | OL537721 | OL537936 | OK469455 | OL537450 |
| AM2SY86 | <a href="#">Gostel 640</a> | Boraginaceae   | <i>Lithospermum</i>   | <i>sp.</i>           | OL537678 | OL537904 | OK469476 | OL537419 |
| AM2SY80 | <a href="#">Gostel 634</a> | Brassicaceae   | <i>Erysimum</i>       | <i>capitatum</i>     | OL537628 | OL537867 | OK469458 | OL537376 |
| AG2KT54 | <a href="#">Gostel 377</a> | Brassicaceae   | <i>Physaria</i>       | <i>recurvata</i>     | OL537724 |          | OK469589 | OL537453 |
| AM2SY75 | <a href="#">Gostel 631</a> | Brassicaceae   | <i>Hesperidanthus</i> | <i>linearifolius</i> | OL537657 | OL537887 | OK469416 | OL537398 |
| AM2SY24 | <a href="#">Gostel 592</a> | Bromeliaceae   | <i>Hechtia</i>        | <i>texensis</i>      | OL537651 | OL354142 | OK469470 |          |
| AM2SY27 | <a href="#">Gostel 595</a> | Bromeliaceae   | <i>Acanthostachys</i> | <i>strobilacea</i>   |          |          | OK469444 |          |
| AM2SX69 | <a href="#">Gostel 537</a> | Cactaceae      | <i>Neobuxbaumia</i>   | <i>sp.</i>           | OL537704 | OL537922 | OK469487 |          |
| AG2KU05 | <a href="#">Gostel 401</a> | Cactaceae      | <i>Cylindropuntia</i> | <i>imbricata</i>     | OL537604 | OL537852 | OK469587 | OL537359 |
| AM2SY87 | <a href="#">Gostel 641</a> | Campanulaceae  | <i>Campanula</i>      | <i>rotundifolia</i>  | OL537578 | OL537835 | OK469465 | OL537334 |
| AG2KL49 | <a href="#">Gostel 455</a> | Celastraceae   | <i>Mortonia</i>       | <i>greggii</i>       | OL537696 | OL537918 | OK469603 | OL537432 |
| AG2KR72 | <a href="#">Gostel 501</a> | Celastraceae   | <i>Mortonia</i>       | <i>greggii</i>       | OL537697 | OL537919 | OK469519 | OL537433 |
| AM2SX80 | <a href="#">Gostel 548</a> | Chloranthaceae | <i>Sarcandra</i>      | <i>glabra</i>        | OL537746 |          | OK469524 | OL537471 |
| AM2SY94 | <a href="#">Gostel 648</a> | Cleomaceae     | <i>Polanisia</i>      | <i>dodecandra</i>    | OL537728 | OL537940 | OK469475 | OL537455 |
| AM2SX88 | <a href="#">Gostel 556</a> | Cleomaceae     | <i>Polanisia</i>      | <i>erosa</i>         | OL537729 |          | OK469523 | OL537456 |
| AM2SY62 | <a href="#">Gostel 622</a> | Commelinaceae  | <i>Tradescantia</i>   | <i>sp.</i>           | OL537779 |          | OK469426 | OL537504 |
| AG2KT70 | <a href="#">Gostel 385</a> | Convolvulaceae | <i>Dichondra</i>      | <i>recurvata</i>     | OL537615 | OL537857 | OK469588 | OL537366 |
| AO7RU81 | <a href="#">Gostel 804</a> | Crassulaceae   | <i>Sedum</i>          | <i>cockerellii</i>   | OL537749 |          | OK469411 | OL537474 |
| AM2SX50 | <a href="#">Gostel 518</a> | Crassulaceae   | <i>Lenophyllum</i>    | <i>texanum</i>       | OL537673 |          | OK469511 | OL537414 |
| AG2KV37 | <a href="#">Gostel 471</a> | Cucurbitaceae  | <i>Ibervillea</i>     | <i>lindheimeri</i>   | OL537663 |          | OK469514 | OL537404 |
| AG2KV45 | <a href="#">Gostel 475</a> | Cupressaceae   | <i>Cupressus</i>      | <i>arizonica</i>     | OL537601 |          |          | OL537356 |



|         |                            |                 |                     |                      |          |          |          |          |
|---------|----------------------------|-----------------|---------------------|----------------------|----------|----------|----------|----------|
| AG2KV25 | <a href="#">Gostel 465</a> | Cyperaceae      | <i>Rhynchospora</i> | <i>colorata</i>      | OL537740 | OL537946 |          | OL537466 |
| AG2KV03 | <a href="#">Gostel 450</a> | Cyperaceae      | <i>Carex</i>        | <i>muhlenbergia</i>  | OL537579 |          |          | OL537335 |
| AM2SW34 | <a href="#">Gostel 497</a> | Dryopteridaceae | <i>Cyrtomium</i>    | <i>falcatum</i>      | OL537605 |          |          |          |
| AM2SY03 | <a href="#">Gostel 571</a> | Ericaceae       | <i>Anthopterus</i>  | <i>schultzeae</i>    | OL537534 |          |          | OL537300 |
| AM2SX49 | <a href="#">Gostel 517</a> | Euphorbiaceae   | <i>Acalypha</i>     | <i>monostachya</i>   | OL537522 |          |          | OL537292 |
| AM2SY08 | <a href="#">Gostel 576</a> | Euphorbiaceae   | <i>Triadica</i>     | <i>sebifera</i>      | OL537780 | OL537974 |          | OL537505 |
| AG2KV67 | <a href="#">Gostel 486</a> | Euphorbiaceae   | <i>Ditaxis</i>      | <i>mercurialina</i>  | OL537618 |          |          |          |
| AG2KU69 | <a href="#">Gostel 433</a> | Euphorbiaceae   | <i>Cnidioscolus</i> | <i>texanus</i>       | OL537594 | OL537846 | OK469584 | OL537351 |
| AO7RU89 | <a href="#">Gostel 815</a> | Euphorbiaceae   | <i>Jatropha</i>     | <i>dioica</i>        | OL537666 | OL537895 | OK469403 | OL537407 |
| AG2KR71 | <a href="#">Gostel 494</a> | Euphorbiaceae   | <i>Croton</i>       | <i>monanthogynus</i> | OL537600 | OL537849 | OK469512 | OL537355 |
| AM2SX97 | <a href="#">Gostel 565</a> | Euphorbiaceae   | <i>Pedilanthus</i>  | <i>sp.</i>           |          | OL537934 | OK469440 | OL537448 |
| AG2KU63 | <a href="#">Gostel 430</a> | Euphorbiaceae   | <i>Stillingia</i>   | <i>texana</i>        | OL537765 | OL537963 | OK469615 | OL537490 |
| AG2KV19 | <a href="#">Gostel 462</a> | Fabaceae        | <i>Coursetia</i>    | <i>axillaris</i>     | OL537598 |          | OK469612 | OL537353 |
| AM2SX92 | <a href="#">Gostel 560</a> | Fabaceae        | <i>Dendrolobium</i> | <i>umbellatum</i>    | OL537612 |          | OK469484 |          |
| AM2SY01 | <a href="#">Gostel 569</a> | Fabaceae        | <i>Lysidice</i>     | <i>rhodostegia</i>   | OL537682 | OL537908 | OK469473 |          |
| AG2KU99 | <a href="#">Gostel 448</a> | Fabaceae        | <i>Dalea</i>        | <i>hallii</i>        | OL537606 |          | OK469592 | OL537360 |
| AG2KU91 | <a href="#">Gostel 444</a> | Fabaceae        | <i>Senna</i>        | <i>roemeriana</i>    | OL537751 | OL537953 | OK469551 | OL537477 |
| AG2KU01 | <a href="#">Gostel 399</a> | Fabaceae        | <i>Caesalpinia</i>  | <i>gilliesii</i>     | OL537575 |          |          |          |
| AM2SW48 | <a href="#">Gostel 506</a> | Fabaceae        | <i>Myrospermum</i>  | <i>sousanum</i>      | OL537701 |          | OK469547 |          |
| AG2KT48 | <a href="#">Gostel 374</a> | Fabaceae        | <i>Lupinus</i>      | <i>texensis</i>      | OL537679 | OL537905 | OK469621 | OL537420 |
| AM2SX51 | <a href="#">Gostel 519</a> | Fabaceae        | <i>Coursetia</i>    | <i>axillaris</i>     | OL537599 |          | OK469503 | OL537354 |
| AG2KV31 | <a href="#">Gostel 468</a> | Fabaceae        | <i>Eysenhardtia</i> | <i>texana</i>        | OL537630 |          | OK469542 | OL537378 |
| AG2KV11 | <a href="#">Gostel 454</a> | Fabaceae        | <i>Sophora</i>      | <i>affinis</i>       | OL537760 | OL537960 | OK469613 | OL537485 |
| AG2KU03 | <a href="#">Gostel 400</a> | Fabaceae        | <i>Parkinsonia</i>  | <i>aculeata</i>      | OL537716 | OL537931 | OK469598 |          |
| AM2SY85 | <a href="#">Gostel 639</a> | Fabaceae        | <i>Astragalus</i>   | <i>giganteus</i>     | OL537541 | OL537811 | OK469415 | OL537306 |
| AM2SX53 | <a href="#">Gostel 521</a> | Fagaceae        | <i>Quercus</i>      | <i>glauca</i>        | OL537736 |          |          |          |
| AO7RU90 | <a href="#">Gostel 816</a> | Fouquieriaceae  | <i>Fouquieria</i>   | <i>splendens</i>     | OL537636 | OL537872 | OK469402 | OL537383 |
| AG2KR63 | <a href="#">Gostel 490</a> | Garryaceae      | <i>Garrya</i>       | <i>ovata</i>         | OL537643 |          | OK469548 | OL537390 |

|         |                            |                |                     |                        |          |          |          |          |
|---------|----------------------------|----------------|---------------------|------------------------|----------|----------|----------|----------|
| AG2KU59 | <a href="#">Gostel 428</a> | Gentianaceae   | <i>Zeltnera</i>     | <i>texensis</i>        | OL537797 | OL537986 | OK469553 | OL537520 |
| AM2SY82 | <a href="#">Gostel 636</a> | Geraniaceae    | <i>Geranium</i>     | <i>caespitosum</i>     | OL537644 |          | OK469441 | OL537391 |
| AM2SY02 | <a href="#">Gostel 570</a> | Gesneriaceae   | <i>Lysionotus</i>   | <i>serrata</i>         | OL537683 |          | OK469463 | OL537422 |
| AM2SX57 | <a href="#">Gostel 525</a> | Hamamelidaceae | <i>Exbucklandia</i> | <i>populnea</i>        | OL537629 |          |          | OL537377 |
| AM2SX68 | <a href="#">Gostel 536</a> | Hamamelidaceae | <i>Rhodoleia</i>    | <i>championii</i>      |          |          |          | OL537465 |
| AM2SX54 | <a href="#">Gostel 522</a> | Hamamelidaceae | <i>Fortunearia</i>  | <i>sinensis</i>        | OL537635 | OL537871 | OK469546 | OL537382 |
| AM2SX77 | <a href="#">Gostel 545</a> | Hydrangeaceae  | <i>Dichroa</i>      | <i>sp.</i>             | OL537616 | OL537858 | OK469486 | OL537367 |
| AM2SY19 | <a href="#">Gostel 587</a> | Hydrangeaceae  | <i>Dichroa</i>      | <i>febrifuga</i>       | OL537617 | OL537859 | OK469445 | OL537368 |
| AM2SX76 | <a href="#">Gostel 544</a> | Hydrangeaceae  | <i>Platycrater</i>  | <i>arguta</i>          | OL537727 | OL537939 | OK469495 |          |
| AM2SY14 | <a href="#">Gostel 582</a> | Hydrangeaceae  | <i>Decumaria</i>    | <i>sinensis</i>        | OL537610 | OL537854 | OK469421 | OL537363 |
| AG2KU31 | <a href="#">Gostel 414</a> | Hypericaceae   | <i>Hypericum</i>    | <i>sp.</i>             | OL537662 |          |          | OL537403 |
| AM2SY18 | <a href="#">Gostel 586</a> | Iridaceae      | <i>Neomarica</i>    | <i>caerulea</i>        | OL537706 | OL537923 | OK469453 |          |
| AM2SX72 | <a href="#">Gostel 540</a> | Iridaceae      | <i>Alophia</i>      | <i>drummondii</i>      | OL537528 |          | OK469394 |          |
| AM2SW38 | <a href="#">Gostel 499</a> | Juglandaceae   | <i>Carya</i>        | <i>illinoensis</i>     | OL537580 |          |          | OL537336 |
| AG2KU73 | <a href="#">Gostel 435</a> | Lamiaceae      | <i>Warnockia</i>    | <i>scutellarioides</i> | OL537791 | OL537981 | OK469563 | OL537514 |
| AG2KU45 | <a href="#">Gostel 421</a> | Lamiaceae      | <i>Salvia</i>       | <i>yangii</i>          | OL537745 | OL537950 | OK469625 | OL537470 |
| AG2KR70 | <a href="#">Gostel 492</a> | Lamiaceae      | <i>Hedeoma</i>      | <i>drummondii</i>      | OL537653 |          | OK469530 |          |
| AG2KV61 | <a href="#">Gostel 483</a> | Lamiaceae      | <i>Marrubium</i>    | <i>vulgare</i>         | OL537687 | OL537909 | OK469540 |          |
| AM2SX81 | <a href="#">Gostel 549</a> | Lamiaceae      | <i>Rostrinucula</i> | <i>dependens</i>       | OL537743 |          |          |          |
| AM2SW40 | <a href="#">Gostel 500</a> | Lamiaceae      | <i>Caryopteris</i>  | <i>x clandonensis</i>  | OL537581 | OL537836 | OK469529 | OL537337 |
| AG2KU33 | <a href="#">Gostel 415</a> | Lamiaceae      | <i>Hedeoma</i>      | <i>sp.</i>             | OL537652 | OL537884 | OK469607 |          |
| AG2KV41 | <a href="#">Gostel 473</a> | Lamiaceae      | <i>Physostegia</i>  | <i>intermedia</i>      | OL537725 |          |          |          |
| AM2SX58 | <a href="#">Gostel 526</a> | Lauraceae      | <i>Nothaphoebe</i>  | <i>cavaleriei</i>      | OL537709 | OL537926 | OK469510 |          |
| AM2SX59 | <a href="#">Gostel 527</a> | Lauraceae      | <i>Machilus</i>     | <i>thunbergii</i>      | OL537684 |          | OK469502 |          |
| AM2SW66 | <a href="#">Gostel 515</a> | Lauraceae      | <i>Neolitsea</i>    | <i>sericea</i>         | OL537705 |          |          |          |
| AM2SY58 | <a href="#">Gostel 618</a> | Loasaceae      | <i>Cevallia</i>     | <i>sinuata</i>         | OL537585 | OL537840 | OK469460 | OL537341 |
| AM2SY63 | <a href="#">Gostel 623</a> | Loasaceae      | <i>Mentzelia</i>    | <i>sp.</i>             | OL537694 | OL537916 | OK469417 | OL537430 |
| AG2KV23 | <a href="#">Gostel 464</a> | Lythraceae     | <i>Heimia</i>       | <i>salicifolia</i>     | OL537654 | OL537885 | OK469590 | OL537396 |

|         |                            |                 |                      |                    |          |          |          |          |
|---------|----------------------------|-----------------|----------------------|--------------------|----------|----------|----------|----------|
| AM2SX93 | <a href="#">Gostel 561</a> | Malvaceae       | <i>Pseudobombax</i>  | <i>elliptica</i>   | OL537731 |          | OK469474 | OL537458 |
| AM2SX84 | <a href="#">Gostel 552</a> | Malvaceae       | <i>Phymosia</i>      | <i>umbellata</i>   | OL537723 | OL537937 | OK469494 | OL537452 |
| AM2SY07 | <a href="#">Gostel 575</a> | Malvaceae       | <i>Kosteletzkya</i>  | <i>sp.</i>         | OL537670 | OL537898 | OK469422 | OL537411 |
| AM2SX75 | <a href="#">Gostel 543</a> | Malvaceae       | <i>Clappertonia</i>  | <i>ficifolia</i>   |          |          |          | OL537348 |
| AG2KV09 | <a href="#">Gostel 453</a> | Marantaceae     | <i>Thalia</i>        | <i>dealbata</i>    | OL537772 |          | OK469395 | OL537497 |
| AG2KV71 | <a href="#">Gostel 488</a> | Melanthiaceae   | <i>Schoenocaulon</i> | <i>texanus</i>     | OL537748 |          |          | OL537472 |
| AM2SW60 | <a href="#">Gostel 512</a> | Menispermaceae  | <i>Menispermum</i>   | <i>sp.</i>         | OL537692 | OL537914 | OK469497 | OL537428 |
| AM2SX86 | <a href="#">Gostel 554</a> | Myrtaceae       | <i>Myrcianthes</i>   | <i>fragrans</i>    | OL537699 |          | OK469543 | OL537435 |
| AM2SY26 | <a href="#">Gostel 594</a> | Myrtaceae       | <i>Acca</i>          | <i>sellowiana</i>  | OL537523 | OL537799 | OK469452 | OL537293 |
| AM2SY22 | <a href="#">Gostel 590</a> | Myrtaceae       | <i>Myrcianthes</i>   | <i>fragrans</i>    | OL537698 | OL537920 | OK469420 | OL537434 |
| AM2SY00 | <a href="#">Gostel 568</a> | Nyctaginaceae   | <i>Okenia</i>        | <i>hypogaea</i>    |          |          | OK469483 | OL537443 |
| AG2KV27 | <a href="#">Gostel 466</a> | Nyctaginaceae   | <i>Nyctaginia</i>    | <i>capitata</i>    | OL537712 |          | OK469571 | OL537442 |
| AG2KU89 | <a href="#">Gostel 443</a> | Oleaceae        | <i>Fraxinus</i>      | <i>americana</i>   | OL537639 | OL537875 | OK469562 | OL537386 |
| AG2KU87 | <a href="#">Gostel 442</a> | Oleaceae        | <i>Fraxinus</i>      | <i>americana</i>   | OL537638 | OL537874 | OK469573 | OL537385 |
| AM2SY57 | <a href="#">Gostel 617</a> | Oleaceae        | <i>Menodora</i>      | <i>sp.</i>         | OL537693 | OL537915 | OK469468 | OL537429 |
| AG2KU29 | <a href="#">Gostel 413</a> | Oleaceae        | <i>Ligustrum</i>     | <i>sinense</i>     | OL537675 | OL537901 | OK469626 | OL537416 |
| AG2KT60 | <a href="#">Gostel 380</a> | Oleaceae        | <i>Forestiera</i>    | <i>pubescens</i>   | OL537634 | OL537870 | OK469559 | OL537381 |
| AG2KR69 | <a href="#">Gostel 491</a> | Onagraceae      | <i>Stenosiphon</i>   | <i>linifolius</i>  | OL537764 | OL537962 |          | OL537489 |
| AG2KV65 | <a href="#">Gostel 485</a> | Ophioglossaceae | <i>Ophioglossum</i>  | <i>engelmannii</i> | OL537713 |          | OK469521 |          |
| AM2SY43 | <a href="#">Gostel 604</a> | Orchidaceae     | <i>Neofinetia</i>    | <i>falcata</i>     | OL354141 |          |          | OL537438 |
| AM2SY30 | <a href="#">Gostel 597</a> | Orchidaceae     | <i>Eria</i>          | <i>lasiopetala</i> | OL537626 | OL537865 |          | OL537374 |
| AM2SY32 | <a href="#">Gostel 598</a> | Orchidaceae     | <i>Coelogyne</i>     | <i>pandurata</i>   | OL537595 | OL537847 |          |          |
| AM2SY34 | <a href="#">Gostel 599</a> | Orchidaceae     | <i>Ansellia</i>      | <i>africana</i>    | OL537533 |          |          |          |
| AM2SY28 | <a href="#">Gostel 596</a> | Orchidaceae     | <i>Dendrobium</i>    | <i>x delicatum</i> | OL537611 | OL537855 |          | OL537364 |
| AM2SY36 | <a href="#">Gostel 600</a> | Orchidaceae     | <i>Tolumnia</i>      | <i>variegata</i>   | OL537777 | OL537973 |          | OL537503 |
| AM2SY38 | <a href="#">Gostel 601</a> | Orchidaceae     | <i>Goodyera</i>      | <i>viridiflora</i> | OL537647 | OL537880 | OK469428 | OL537394 |
| AM2SY41 | <a href="#">Gostel 603</a> | Orchidaceae     | <i>Schoenorchis</i>  | <i>gemmata</i>     |          | OL537951 |          | OL537473 |
| AG2KT52 | <a href="#">Gostel 376</a> | Orobanchaceae   | <i>Castilleja</i>    | <i>indivisa</i>    | OL537583 | OL537838 | OK469601 | OL537339 |



|         |                            |                 |                      |                        |          |          |          |          |
|---------|----------------------------|-----------------|----------------------|------------------------|----------|----------|----------|----------|
| AG2KV49 | <a href="#">Gostel 477</a> | Papaveraceae    | <i>Hunnemannia</i>   | <i>fumariifolia</i>    | OL537660 | OL537890 | OK469532 |          |
| AM2SX78 | <a href="#">Gostel 546</a> | Pentaphragaceae | <i>Adinandra</i>     | <i>glischroloma</i>    | OL537527 | OL537803 | OK469544 | OL537297 |
| AM2SW58 | <a href="#">Gostel 511</a> | Pentaphragaceae | <i>Cleyera</i>       | <i>japonica</i>        | OL537593 | OL537845 | OK469504 | OL537350 |
| AM2SX52 | <a href="#">Gostel 520</a> | Phyllanthaceae  | <i>Bischofia</i>     | <i>polycarpa</i>       | OL537567 |          |          |          |
| AG2KU51 | <a href="#">Gostel 424</a> | Phytolaccaceae  | <i>Rivina</i>        | <i>humilis</i>         | OL537741 | OL537947 | OK469595 | OL537467 |
| AG2KL45 | <a href="#">Gostel 457</a> | Plantaginaceae  | <i>Maurandya</i>     | <i>antirrhiniflora</i> | OL537689 | OL537911 | OK469581 | OL537425 |
| AG2KL43 | <a href="#">Gostel 458</a> | Plantaginaceae  | <i>Stemodia</i>      | <i>lanata</i>          | OL537762 |          | OK469572 | OL537487 |
| AG2KU71 | <a href="#">Gostel 434</a> | Plantaginaceae  | <i>Plantago</i>      | <i>aristata</i>        | OL537726 | OL537938 | OK469574 | OL537454 |
| AG2KT66 | <a href="#">Gostel 383</a> | Plantaginaceae  | <i>Nuttallanthus</i> | <i>texanus</i>         | OL537711 | OL537928 | OK469610 | OL537441 |
| AG2KU07 | <a href="#">Gostel 402</a> | Poaceae         | <i>Elymus</i>        | <i>canadensis</i>      | OL537624 |          | OK469577 | OL537372 |
| AG2KU21 | <a href="#">Gostel 409</a> | Poaceae         | <i>Tripsacum</i>     | <i>dactyloides</i>     | OL537781 |          | OK469393 |          |
| AG2KU95 | <a href="#">Gostel 446</a> | Poaceae         | <i>Dichanthelium</i> | <i>sp.</i>             | OL537614 |          |          |          |
| AG2KU85 | <a href="#">Gostel 441</a> | Poaceae         | <i>Elymus</i>        | <i>canadensis</i>      | OL537623 |          | OK469583 | OL537371 |
| AG2KV75 | <a href="#">Gostel 482</a> | Poaceae         | <i>Coelorachis</i>   | <i>cylindrica</i>      | OL537596 |          |          |          |
| AG2KU13 | <a href="#">Gostel 405</a> | Poaceae         | <i>Bouteloua</i>     | <i>curtipendula</i>    |          |          |          | OL537331 |
| AM2SX94 | <a href="#">Gostel 562</a> | Podocarpaceae   | <i>Phyllocladus</i>  | <i>toatoa</i>          | OL537722 |          | OK469464 | OL537451 |
| AM2SX99 | <a href="#">Gostel 567</a> | Podocarpaceae   | <i>Retrophyllum</i>  | <i>minus</i>           | OL537738 |          |          | OL537463 |
| AN6GL56 | <a href="#">Gostel 827</a> | Polemoniaceae   | <i>Giliastrum</i>    | <i>acerosum</i>        | OL537645 | OL537878 | OK469397 | OL537392 |
| AG2KV29 | <a href="#">Gostel 467</a> | Polemoniaceae   | <i>Ipomopsis</i>     | <i>rubra</i>           |          |          |          | OL537405 |
| AG2KV33 | <a href="#">Gostel 469</a> | Polemoniaceae   | <i>Giliastrum</i>    | <i>incisum</i>         | OL537646 | OL537879 | OK469533 | OL537393 |
| AM2SY47 | <a href="#">Gostel 607</a> | Polygonaceae    | <i>Eriogonum</i>     | <i>sp.</i>             | OL537627 | OL537866 | OK469469 | OL537375 |
| AM2SY45 | <a href="#">Gostel 605</a> | Portulacaceae   | <i>Portulaca</i>     | <i>sp.</i>             | OL537730 |          | OK469481 | OL537457 |
| AM2SY59 | <a href="#">Gostel 619</a> | Pteridaceae     | <i>Astrolepis</i>    | <i>sinuata</i>         | OL537542 |          |          |          |
| AM2SY60 | <a href="#">Gostel 620</a> | Pteridaceae     | <i>Myriopteris</i>   | <i>aurea</i>           | OL537700 |          |          |          |
| AM2SY61 | <a href="#">Gostel 621</a> | Pteridaceae     | <i>Pellaea</i>       | <i>truncata</i>        | OL537719 |          |          |          |
| AM2SY79 | <a href="#">Gostel 633</a> | Ranunculaceae   | <i>Aquilegia</i>     | <i>longissima</i>      | OL537535 | OL537805 | OK469466 | OL537301 |
| AG2KV05 | <a href="#">Gostel 451</a> | Ranunculaceae   | <i>Clematis</i>      | <i>pitcheri</i>        | OL537592 |          | OK469561 | OL537349 |
| AM2SY84 | <a href="#">Gostel 638</a> | Ranunculaceae   | <i>Thalictrum</i>    | <i>fendleri</i>        | OL537773 | OL537969 | OK469424 | OL537498 |

|         |                            |                 |                      |                     |          |          |          |          |
|---------|----------------------------|-----------------|----------------------|---------------------|----------|----------|----------|----------|
| AG2KV01 | <a href="#">Gostel 449</a> | Rhamnaceae      | <i>Rhamnus</i>       | <i>caroliniana</i>  | OL537739 | OL537945 | OK469582 | OL537464 |
| AO7RU82 | <a href="#">Gostel 805</a> | Rhamnaceae      | <i>Frangula</i>      | <i>purshiana</i>    | OL537637 | OL537873 | OK469410 | OL537384 |
| AM2SX87 | <a href="#">Gostel 555</a> | Rhamnaceae      | <i>Sageretia</i>     | <i>thea</i>         | OL537744 | OL537949 | OK469534 | OL537469 |
| AG2KV73 | <a href="#">Gostel 489</a> | Rosaceae        | <i>Vauquelinia</i>   | <i>corymbosa</i>    | OL537786 | OL537977 | OK469492 | OL537509 |
| AM2SW52 | <a href="#">Gostel 508</a> | Rosaceae        | <i>Pseudocydonia</i> | <i>sinensis</i>     | OL537732 | OL537941 | OK469528 |          |
| AM2SY91 | <a href="#">Gostel 645</a> | Rosaceae        | <i>Fallugia</i>      | <i>paradoxa</i>     | OL537631 |          | OK469434 | OL537379 |
| AG2KT72 | <a href="#">Gostel 386</a> | Rubiaceae       | <i>Houstonia</i>     | <i>pusilla</i>      | OL537659 | OL537889 | OK469579 | OL537400 |
| AM2SX82 | <a href="#">Gostel 550</a> | Rubiaceae       | <i>Damnacanthus</i>  | <i>indicus</i>      | OL537607 |          |          |          |
| AM2SY67 | <a href="#">Gostel 627</a> | Rubiaceae       | <i>Galium</i>        | <i>sp.</i>          | OL537642 | OL537877 | OK469450 | OL537389 |
| AM2SY20 | <a href="#">Gostel 588</a> | Rubiaceae       | <i>Serissa</i>       | <i>japonica</i>     | OL537752 | OL537954 | OK469437 | OL537478 |
| AM2SX65 | <a href="#">Gostel 533</a> | Rubiaceae       | <i>Bouvardia</i>     | <i>ternifolia</i>   | OL537572 | OL537832 | OK469517 | OL537332 |
| AG2KU55 | <a href="#">Gostel 426</a> | Rubiaceae       | <i>Stenaria</i>      | <i>nigricans</i>    | OL537763 | OL537961 | OK469575 | OL537488 |
| AM2SX98 | <a href="#">Gostel 566</a> | Rubiaceae       | <i>Rondeletia</i>    | <i>odorata</i>      | OL537742 | OL537948 | OK469433 | OL537468 |
| AG2KT98 | <a href="#">Gostel 460</a> | Ruscaceae       | <i>Nolina</i>        | <i>texana</i>       | OL537708 | OL537925 | OK469549 |          |
| AM2SX64 | <a href="#">Gostel 532</a> | Rutaceae        | <i>Decatropis</i>    | <i>bicolor</i>      | OL537609 |          | OK469525 | OL537362 |
| AM2SX56 | <a href="#">Gostel 524</a> | Rutaceae        | <i>Casimiroa</i>     | <i>pringlei</i>     | OL537582 | OL537837 | OK469526 | OL537338 |
| AG2KV17 | <a href="#">Gostel 461</a> | Rutaceae        | <i>Amyris</i>        | <i>madrensis</i>    | OL537530 | OL537804 |          |          |
| AM2SY13 | <a href="#">Gostel 581</a> | Rutaceae        | <i>Choisya</i>       | <i>sp.</i>          | OL537590 |          | OK469431 | OL537346 |
| AM2SX85 | <a href="#">Gostel 553</a> | Salicaceae      | <i>Itoa</i>          | <i>orientalis</i>   | OL537664 | OL537893 | OK469485 | OL537406 |
| AG2KU25 | <a href="#">Gostel 411</a> | Sapindaceae     | <i>Koelreuteria</i>  | <i>paniculata</i>   | OL537669 |          | OK469566 | OL537410 |
| AG2KU09 | <a href="#">Gostel 403</a> | Sapindaceae     | <i>Ungradia</i>      | <i>speciosa</i>     | OL537785 |          | OK469567 | OL537508 |
| AG2KU17 | <a href="#">Gostel 407</a> | Sapotaceae      | <i>Sideroxylon</i>   | <i>lanuginosum</i>  | OL537753 | OL537955 | OK469608 | OL537479 |
| AG2KV43 | <a href="#">Gostel 474</a> | Saururaceae     | <i>Anemopsis</i>     | <i>californica</i>  | OL537531 |          |          |          |
| AM2SY83 | <a href="#">Gostel 637</a> | Selaginellaceae | <i>Selaginella</i>   | <i>sp.</i>          |          |          |          | OL537475 |
| AG2KT64 | <a href="#">Gostel 382</a> | Solanaceae      | <i>Bouchetia</i>     | <i>erecta</i>       | OL537571 | OL537831 | OK469620 | OL537330 |
| AO7RU87 | <a href="#">Gostel 813</a> | Solanaceae      | <i>Nicotiana</i>     | <i>glauca</i>       | OL537707 | OL537924 | OK469405 | OL537439 |
| AG2KV39 | <a href="#">Gostel 472</a> | Solanaceae      | <i>Bouchetia</i>     | <i>erecta</i>       | OL537570 | OL537830 | OK469507 |          |
| AG2KV55 | <a href="#">Gostel 480</a> | Solanaceae      | <i>Lycium</i>        | <i>carolinianum</i> | OL537680 | OL537906 | OK469498 |          |

|         |                              |                  |                        |                      |          |          |          |          |
|---------|------------------------------|------------------|------------------------|----------------------|----------|----------|----------|----------|
| AM2SY12 | <a href="#">Gostel 580</a>   | Solanaceae       | <i>Juanulloa</i>       | <i>aurantiaca</i>    | OL537668 | OL537897 | OK469438 | OL537409 |
| AM2SW54 | <a href="#">Gostel 509</a>   | Styracaceae      | <i>Sinojackia</i>      | <i>xylocarpa</i>     | OL537755 |          | OK469518 |          |
| AO7RU88 | <a href="#">Gostel 814</a>   | Tamaricaceae     | <i>Tamarix</i>         | <i>ramosissima</i>   | OL537768 | OL537966 | OK469404 | OL537493 |
| AM2SX55 | <a href="#">Gostel 523</a>   | Taxaceae         | <i>Amentotaxus</i>     | <i>argotaenia</i>    | OL537529 |          | OK469538 | OL537298 |
| AM2SX96 | <a href="#">Gostel 564</a>   | Tecophilaeaceae  | <i>Cyanastrum</i>      | <i>cordifolium</i>   | OL537602 | OL537850 | OK469447 | OL537357 |
| AM2SY23 | <a href="#">Gostel 591</a>   | Theaceae         | <i>Schima</i>          | <i>argentea</i>      | OL537747 |          | OK469482 |          |
| AM2SY25 | <a href="#">Gostel 593</a>   | Theaceae         | <i>Gordonia</i>        | <i>axillaris</i>     | OL537648 | OL537881 | OK469461 |          |
| AM2SW64 | <a href="#">Gostel 514</a>   | Thymelaeaceae    | <i>Wikstroemia</i>     | <i>indica</i>        | OL537793 |          |          | OL537516 |
| AM2SX61 | <a href="#">Gostel 529</a>   | Verbenaceae      | <i>Bouchea</i>         | <i>linifolia</i>     | OL537569 |          | OK469488 | OL537329 |
| AG2KU23 | <a href="#">Gostel 410</a>   | Verbenaceae      | <i>Phyla</i>           | <i>nodiflora</i>     | OL537720 | OL537935 | OK469392 | OL537449 |
| AM2SX90 | <a href="#">Gostel 558</a>   | Verbenaceae      | <i>Nashia</i>          | <i>inaguensis</i>    | OL537703 | OL537921 | OK469508 | OL537437 |
| AG2KV07 | <a href="#">Gostel 452</a>   | Vitaceae         | <i>Vitis</i>           | <i>mustangensis</i>  | OL537790 |          | OK469550 | OL537513 |
| AM2SW46 | <a href="#">Gostel 505</a>   | Xanthorrhoeaceae | <i>Hemiphylacus</i>    | <i>hintoniorum</i>   | OL537656 | OL537886 | OK469490 | OL537397 |
| AM2SY15 | <a href="#">Gostel 583</a>   | Zamiaceae        | <i>Lepidozamia</i>     | <i>peroffskyana</i>  | OL537674 |          |          | OL537415 |
| AM2SY21 | <a href="#">Gostel 589</a>   | Zamiaceae        | <i>Macrozamia</i>      | <i>miquelii</i>      | OL537685 |          | OK469430 | OL537423 |
| AM2SY56 | <a href="#">Gostel 616</a>   | Zygophyllaceae   | <i>Larrea</i>          | <i>tridentata</i>    | OL537672 | OL537900 | OK469479 | OL537413 |
| AO7RU91 | <a href="#">Gostel 817</a>   | Zygophyllaceae   | <i>Larrea</i>          | <i>tridentata</i>    | OL537671 | OL537899 | OK469401 | OL537412 |
| AI4GS09 | <a href="#">Carlsen 3046</a> | Acanthaceae      | <i>Schaueria</i>       | <i>flavicoma</i>     | MH748804 | MT362769 | MH749313 | MT358295 |
| AG5NO77 | <a href="#">Carlsen 3039</a> | Acanthaceae      | <i>Odontonema</i>      | <i>sp.</i>           | MH748802 | MT362762 | MH749310 | MH762913 |
| AI4GQ59 | <a href="#">Carlsen 3030</a> | Acanthaceae      | <i>Sanchezia</i>       | <i>speciosa</i>      | MT358304 | MH748866 | MH749312 | MH762914 |
| AG5NO73 | <a href="#">Carlsen 3038</a> | Acanthaceae      | <i>Fittonia</i>        | <i>albivenis</i>     | MH748800 | MT362755 | MH749307 | MT358286 |
| AG5NO71 | <a href="#">Carlsen 3037</a> | Acanthaceae      | <i>Pseuderanthemum</i> | <i>carruthersii</i>  | MH748803 | MT362767 | MH749311 |          |
| AI4GR95 | <a href="#">Carlsen 3054</a> | Acanthaceae      | <i>Louteridium</i>     | <i>costaricense</i>  |          | MT362758 | MH749308 | MH762911 |
| AI4GU82 | <a href="#">Carlsen 3225</a> | Acanthaceae      | <i>Acanthus</i>        | <i>mollis</i>        | OL536713 | OL689852 | OL312276 | OL536333 |
| AI4GT83 | <a href="#">Carlsen 3116</a> | Acanthaceae      | <i>Ruellia</i>         | <i>yurimaguensis</i> | OL537093 | OL690145 | OL312306 | OL536640 |
| AI4GT65 | <a href="#">Carlsen 3125</a> | Acanthaceae      | <i>Dianthera</i>       | <i>pectoralis</i>    | OL536860 | OL689961 | OL312312 | OL536448 |
| AI4GT97 | <a href="#">Carlsen 3110</a> | Acanthaceae      | <i>Justicia</i>        | <i>scheidweileri</i> | OL536958 | OL690042 | OL312304 | OL536530 |
| AI4GU03 | <a href="#">Carlsen 3113</a> | Acanthaceae      | <i>Aphelandra</i>      | <i>crispata</i>      | OL536748 | OL689877 | OL312170 | OL536361 |

|         |                              |                |                         |                         |          |          |          |          |
|---------|------------------------------|----------------|-------------------------|-------------------------|----------|----------|----------|----------|
| AI4GR44 | <a href="#">Carlsen 3096</a> | Acanthaceae    | <i>Eranthemum</i>       | <i>pulchellum</i>       | OL536890 | OL689981 | OL312095 | OL536474 |
| AI4GU15 | <a href="#">Carlsen 3103</a> | Acanthaceae    | <i>Pachystachys</i>     | <i>lutea</i>            | OL537027 | OL690095 | OL312102 | OL536592 |
| AI4GU13 | <a href="#">Carlsen 3102</a> | Acanthaceae    | <i>Thunbergia</i>       | <i>erecta</i>           | OL537147 | OL690189 | OL312101 | OL536686 |
| AI4GX66 | <a href="#">Carlsen 3384</a> | Acanthaceae    | <i>Acanthus</i>         | <i>montanus</i>         | OL536714 | OL689853 | OL312164 | OL536334 |
| AL5LR51 | <a href="#">Carlsen 3508</a> | Acanthaceae    | <i>Chamaeranthemum</i>  | <i>beyrichii</i>        | OL536811 | OL689924 | OL312382 |          |
| AL5LT07 | <a href="#">Carlsen 3589</a> | Acanthaceae    | <i>Avicennia</i>        | <i>germinans</i>        | OL536764 | OL689888 | OL312420 | OL536373 |
| AL5LS11 | <a href="#">Carlsen 3548</a> | Adiantaceae    | <i>Coniogramme</i>      | <i>japonica</i>         |          |          | OL312495 |          |
| AL5LS79 | <a href="#">Carlsen 3594</a> | Adiantaceae    | <i>Hemionitis</i>       | <i>palmata</i>          | OL536933 |          | OL312425 |          |
| AI4GT13 | <a href="#">Carlsen 3154</a> | Adoxaceae      | <i>Viburnum</i>         | <i>japonicum</i>        | OL537159 | OL690198 | OL312121 | OL536696 |
| AL5LQ63 | <a href="#">Carlsen 3473</a> | Agavaceae      | <i>Yucca</i>            | <i>necopina</i>         | OL537169 | OL690205 | OL312463 | OL536704 |
| AI4GS37 | <a href="#">Carlsen 3192</a> | Aizoaceae      | <i>Mesembryanthemum</i> | <i>cordifolium</i>      | OL536997 | OL690067 | OL312178 | OL536566 |
| AL5LQ99 | <a href="#">Carlsen 3493</a> | Aizoaceae      | <i>Delosperma</i>       | <i>cooperi</i>          | OL536855 | OL689957 | OL312473 | OL536444 |
| AI4GV33 | <a href="#">Carlsen 3268</a> | Alismataceae   | <i>Echinodorus</i>      | <i>osiris</i>           | OL536884 | OL689977 | OL312192 | OL536468 |
| AI4GR65 | <a href="#">Carlsen 3074</a> | Amaranthaceae  | <i>Pleuropetalum</i>    | <i>darwinii</i>         | MH748805 | MT362765 | MH749314 | MH762915 |
| AI4GX77 | <a href="#">Carlsen 3389</a> | Amaryllidaceae | <i>Narcissus</i>        | <i>tazetta</i>          | OL537005 | OL690075 | OL312242 | OL536573 |
| AI4GW74 | <a href="#">Carlsen 3339</a> | Amaryllidaceae | <i>Pancratium</i>       | <i>canariense</i>       | OL537029 | OL690097 | OL312214 | OL536593 |
| AI4GX50 | <a href="#">Carlsen 3377</a> | Amaryllidaceae | <i>Crinum</i>           | <i>asiaticum</i>        | OL536837 | OL689944 | OL312156 | OL536431 |
| AI4GT17 | <a href="#">Carlsen 3151</a> | Amaryllidaceae | <i>Zephyranthes</i>     | <i>simpsonii</i>        | OL537173 | OL690207 | OL312118 | OL536708 |
| AI4GT69 | <a href="#">Carlsen 3127</a> | Amaryllidaceae | <i>Clivia</i>           | <i>miniata</i>          | OL536825 | OL689935 | OL312314 |          |
| AI4GV41 | <a href="#">Carlsen 3281</a> | Amaryllidaceae | <i>Crinum</i>           | <i>americanum</i>       | OL536836 | OL689943 | OL312204 | OL536430 |
| AI4GX81 | <a href="#">Carlsen 3391</a> | Amaryllidaceae | <i>Hippeastrum</i>      | <i>striatum</i>         | OL536937 | OL690021 | OL312244 | OL536512 |
| AI4GV85 | <a href="#">Carlsen 3299</a> | Amaryllidaceae | <i>Agapanthus</i>       | <i>africanus</i>        | OL536730 | OL689863 | OL312334 | OL536346 |
| AI4GW20 | <a href="#">Carlsen 3318</a> | Amaryllidaceae | <i>Hymenocallis</i>     | <i>harrisiana</i>       | OL536945 | OL690029 | OL312345 | OL536520 |
| AI4GV89 | <a href="#">Carlsen 3303</a> | Amaryllidaceae | <i>Habranthus</i>       | <i>robustus</i>         | OL536921 | OL690007 | OL312337 | OL536499 |
| AL5LQ47 | <a href="#">Carlsen 3465</a> | Amaryllidaceae | <i>Hymenocallis</i>     | <i>choctawensis</i>     |          | OL354145 |          | OL536519 |
| AL5LS85 | <a href="#">Carlsen 3584</a> | Amaryllidaceae | <i>Eucrosia</i>         | <i>bicolor</i>          | OL536896 | OL689986 | OL312417 |          |
| AL5LR09 | <a href="#">Carlsen 3501</a> | Anacardiaceae  | <i>Pachycormus</i>      | <i>discolor</i>         | OL537025 |          | OL312376 | OL536590 |
| AL5LR71 | <a href="#">Carlsen 3521</a> | Anacardiaceae  | <i>Sorindeia</i>        | <i>madagascariensis</i> | OL537122 | OL690169 | OL312482 | OL536666 |

|         |                              |                   |                         |                       |          |          |          |          |
|---------|------------------------------|-------------------|-------------------------|-----------------------|----------|----------|----------|----------|
| AI4GX89 | <a href="#">Carlsen 3456</a> | Anacardiaceae     | <i>Pistacia</i>         | <i>lentiscus</i>      | OL537055 |          | OL312454 | OL536614 |
| AL5LQ81 | <a href="#">Carlsen 3482</a> | Anacardiaceae     | <i>Rhus</i>             | <i>integrifolia</i>   | OL537088 |          | OL312368 | OL536635 |
| AL5LR39 | <a href="#">Carlsen 3510</a> | Ancistrocladaceae | <i>Ancistrocladus</i>   | <i>robertsoniorum</i> | OL536743 | OL689873 | OL312477 | OL536357 |
| AL5LR63 | <a href="#">Carlsen 3527</a> | Annonaceae        | <i>Sapranthus</i>       | <i>microcarpus</i>    | OL537101 |          | OL312388 | OL536647 |
| AL5LS65 | <a href="#">Carlsen 3571</a> | Annonaceae        | <i>Tridimeris</i>       | <i>hahniana</i>       | OL537153 |          | OL312411 | OL536690 |
| AI4GU62 | <a href="#">Carlsen 3243</a> | Apiaceae          | <i>Eryngium</i>         | <i>armatum</i>        | OL536893 | OL689984 | OL312290 | OL536477 |
| AI4GQ71 | <a href="#">Carlsen 3024</a> | Apocynaceae       | <i>Carissa</i>          | <i>bispinosa</i>      | MH748807 | MH748868 | MT441725 | MH762916 |
| AI4GV88 | <a href="#">Carlsen 3302</a> | Apocynaceae       | <i>Pachypodium</i>      | <i>lamerei</i>        | OL537026 | OL690094 | OL312336 | OL536591 |
| AI4GR33 | <a href="#">Carlsen 3091</a> | Apocynaceae       | <i>Hoya</i>             | <i>macgillivrayi</i>  | OL536941 | OL690025 | OL312090 | OL536516 |
| AI4GX11 | <a href="#">Carlsen 3358</a> | Apocynaceae       | <i>Plumeria</i>         | <i>sp.</i>            | OL537063 | OL690123 | OL312228 | OL536620 |
| AL5LR43 | <a href="#">Carlsen 3514</a> | Apocynaceae       | <i>Dischidia</i>        | <i>chinensis</i>      | OL536869 | OL689966 | OL312479 |          |
| AI4GX95 | <a href="#">Carlsen 3453</a> | Apocynaceae       | <i>Cynanchum</i>        | <i>arenarium</i>      | OL536846 | OL689950 | OL312452 | OL536438 |
| AL5LR93 | <a href="#">Carlsen 3535</a> | Apocynaceae       | <i>Mandevilla</i>       | <i>hirsuta</i>        | OL536987 |          | OL312490 |          |
| AL5LR91 | <a href="#">Carlsen 3534</a> | Apocynaceae       | <i>Allamanda</i>        | <i>cathartica</i>     | OL536737 | OL689868 | OL312489 | OL536352 |
| AI4GQ86 | <a href="#">Carlsen 3006</a> | Araceae           | <i>Pseudodracontium</i> | <i>harmandii</i>      | MH748811 | MH748871 |          | MT358294 |
| AI4GQ90 | <a href="#">Carlsen 3004</a> | Araceae           | <i>Typhonium</i>        | <i>blumei</i>         | MH748816 | MH748876 | MH749321 | MT358299 |
| AI4GQ92 | <a href="#">Carlsen 3003</a> | Araceae           | <i>Arisaema</i>         | <i>thunbergii</i>     | MH748810 | MT362748 | MH749317 | MH762919 |
| AI4GQ94 | <a href="#">Carlsen 3002</a> | Araceae           | <i>Synandropadix</i>    | <i>vermitoxicus</i>   | MH748815 | MH748875 | MH749320 | MT358297 |
| AI4GR97 | <a href="#">Carlsen 3051</a> | Araceae           | <i>Schismatoglottis</i> | <i>calyptrata</i>     | MH748813 | MH748873 | MH749318 | MT358296 |
| AI4GW65 | <a href="#">Carlsen 3335</a> | Araceae           | <i>Anchomanes</i>       | <i>difformis</i>      | OL536742 | OL689872 | OL312211 | OL536356 |
| AI4GT67 | <a href="#">Carlsen 3126</a> | Araceae           | <i>Gonatopus</i>        | <i>boivinii</i>       | OL536916 | OL690003 | OL312313 | OL536496 |
| AI4GX83 | <a href="#">Carlsen 3388</a> | Araceae           | <i>Pinellia</i>         | <i>tripartita</i>     | OL537050 | OL690115 |          | OL536610 |
| AI4GU91 | <a href="#">Carlsen 3195</a> | Araceae           | <i>Monstera</i>         | <i>sp.</i>            | OL537002 | OL690071 | OL312265 |          |
| AI4GX42 | <a href="#">Carlsen 3371</a> | Araceae           | <i>Spathiphyllum</i>    | <i>phryniifolium</i>  | OL537125 | OL690172 | OL312153 | OL536669 |
| AI4GT81 | <a href="#">Carlsen 3133</a> | Araceae           | <i>Spathicarpa</i>      | <i>hastifolia</i>     | OL537124 | OL690171 | OL312319 | OL536668 |
| AI4GX73 | <a href="#">Carlsen 3386</a> | Araceae           | <i>Rhodospatha</i>      | <i>badilloi</i>       | OL537086 | OL690139 | OL312165 | OL536633 |
| AI4GS18 | <a href="#">Carlsen 3208</a> | Araceae           | <i>Zamioculcas</i>      | <i>zamiifolia</i>     | OL537172 | OL690206 | OL312131 | OL536707 |
| AI4GT61 | <a href="#">Carlsen 3123</a> | Araceae           | <i>Philodendron</i>     | <i>fendleri</i>       | OL537043 | OL690110 |          | OL536605 |



|         |                               |            |                       |                        |          |          |          |          |
|---------|-------------------------------|------------|-----------------------|------------------------|----------|----------|----------|----------|
| AI4GT91 | <a href="#">Carlsen 3107</a>  | Araceae    | <i>Pistia</i>         | <i>stratiotes</i>      | OL537056 |          | OL312301 |          |
| AI4GS20 | <a href="#">Carlsen 3205</a>  | Araceae    | <i>Anthurium</i>      | <i>lilacinum</i>       | OL536746 | OL689875 | OL312186 |          |
| AI4GX70 | <a href="#">Carlsen 3385</a>  | Araceae    | <i>Adelonema</i>      | <i>picturatum</i>      | OL536717 | OL689854 |          | OL536336 |
| AI4GX69 | <a href="#">Carlsen 3385b</a> | Araceae    | <i>Adelonema</i>      | <i>picturatum</i>      | OL536718 | OL689855 |          | OL536337 |
| AI4GU63 | <a href="#">Carlsen 3244</a>  | Araceae    | <i>Peltandra</i>      | <i>virginica</i>       | OL537039 | OL690107 | OL312291 | OL536601 |
| AI4GX10 | <a href="#">Carlsen 3357</a>  | Araceae    | <i>Aglaonema</i>      | <i>commutatum</i>      | OL536734 | OL689866 | OL312227 | OL536349 |
| AI4GV63 | <a href="#">Carlsen 3277</a>  | Araceae    | <i>Stenospermaton</i> | <i>marantifolium</i>   | OL537130 | OL690176 | OL312200 |          |
| AI4GR13 | <a href="#">Carlsen 3086</a>  | Araceae    | <i>Orontium</i>       | <i>aquaticum</i>       | OL537019 | OL690087 | OL312085 | OL536584 |
| AI4GU01 | <a href="#">Carlsen 3112</a>  | Araceae    | <i>Aglaonema</i>      | <i>sp.</i>             | OL536733 | OL689865 | OL312169 | OL536348 |
| AI4GX75 | <a href="#">Carlsen 3387</a>  | Araceae    | <i>Carlephyton</i>    | <i>glaucophyllum</i>   | OL536802 | OL689918 | OL312166 | OL536401 |
| AL5LQ55 | <a href="#">Carlsen 3469</a>  | Araceae    | <i>Arum</i>           | <i>concinatum</i>      | OL536757 | OL689884 | OL312459 | OL536369 |
| AL5LS01 | <a href="#">Carlsen 3540</a>  | Araceae    | <i>Lagenandra</i>     | <i>ovata</i>           | OL536967 | OL690046 | OL312493 | OL536536 |
| AL5LS09 | <a href="#">Carlsen 3544</a>  | Araceae    | <i>Amydrium</i>       | <i>sp.</i>             | OL536741 | OL689871 | OL312394 |          |
| AI4GY27 | <a href="#">Carlsen 3440</a>  | Araliaceae | <i>Hedera</i>         | <i>nepalensis</i>      | OL536928 | OL690014 | OL312446 | OL536504 |
| AI4GR71 | <a href="#">Carlsen 3071</a>  | Arecaceae  | <i>Rhapis</i>         | <i>subtilis</i>        | MH748817 | MH748877 | MT441728 |          |
| AI4GR48 | <a href="#">Carlsen 3098</a>  | Arecaceae  | <i>Chamaedorea</i>    | <i>tenella</i>         | OL536810 | OL689923 | OL312097 | OL536409 |
| AI4GU83 | <a href="#">Carlsen 3226</a>  | Arecaceae  | <i>Chamaerops</i>     | <i>humilis</i>         | OL536812 | OL689925 | OL312277 | OL536410 |
| AI4GW50 | <a href="#">Carlsen 3327</a>  | Arecaceae  | <i>Sabal</i>          | <i>minor</i>           | OL537096 | OL690147 | OL312353 | OL536642 |
| AI4GR50 | <a href="#">Carlsen 3099</a>  | Arecaceae  | <i>Chamaedorea</i>    | <i>ernesti-angusti</i> | OL536809 | OL689922 | OL312098 | OL536408 |
| AI4GV35 | <a href="#">Carlsen 3269</a>  | Arecaceae  | <i>Licuala</i>        | <i>grandis</i>         | OL536973 | OL354144 | OL312193 | OL536542 |
| AI4GV31 | <a href="#">Carlsen 3267</a>  | Arecaceae  | <i>Caryota</i>        | <i>mitis</i>           | OL536805 | OL689921 |          |          |
| AL5LT13 | <a href="#">Carlsen 3592</a>  | Arecaceae  | <i>Butia</i>          | <i>capitata</i>        | OL536788 |          | OL312423 |          |
| AL5LR47 | <a href="#">Carlsen 3511</a>  | Arecaceae  | <i>Acoelorrhaphe</i>  | <i>wrightii</i>        | OL536715 |          | OL312383 |          |
| AL5LQ97 | <a href="#">Carlsen 3490</a>  | Arecaceae  | <i>Jubaea</i>         | <i>chilensis</i>       |          | OL690041 |          |          |
| AL5LT15 | <a href="#">Carlsen 3539b</a> | Arecaceae  | <i>Hyophorbe</i>      | <i>lagenicaulis</i>    | OL536946 | OL690030 | OL312392 |          |
| AL5LS05 | <a href="#">Carlsen 3539</a>  | Arecaceae  | <i>Hyophorbe</i>      | <i>lagenicaulis</i>    | OL536947 | OL690031 | OL312391 |          |
| AL5LQ43 | <a href="#">Carlsen 3463</a>  | Arecaceae  | <i>Trachycarpus</i>   | <i>fortunei</i>        | OL537149 |          | OL312367 |          |
| AL5LT26 | <a href="#">Carlsen 3600</a>  | Arecaceae  | <i>Drymophloeus</i>   | <i>litigiosus</i>      | OL536879 | OL689974 | OL312429 | OL536464 |

|         |                              |                  |                        |                                          |          |          |          |          |
|---------|------------------------------|------------------|------------------------|------------------------------------------|----------|----------|----------|----------|
| AI4GV61 | <a href="#">Carlsen 3274</a> | Aristolochiaceae | <i>Aristolochia</i>    | <i>arborea</i>                           | OL536754 | OL689882 | OL312198 | OL536366 |
| AI4GV17 | <a href="#">Carlsen 3260</a> | Aristolochiaceae | <i>Aristolochia</i>    | <i>gigantea</i>                          | OL536755 | OL689883 | OL312294 | OL536367 |
| AI4GU70 | <a href="#">Carlsen 3233</a> | Aristolochiaceae | <i>Saruma</i>          | <i>henryi</i>                            | OL537105 | OL690155 | OL312284 | OL536650 |
| AL5LS75 | <a href="#">Carlsen 3574</a> | Aristolochiaceae | <i>Pararistolochia</i> | <i>goldieana</i>                         | OL537032 | OL690100 | OL312413 | OL536594 |
| AG5NO79 | <a href="#">Carlsen 3044</a> | Asparagaceae     | <i>Eucharis</i>        | <i>plicata</i>                           | MH748806 | MH748867 |          | MT358285 |
| AI4GW80 | <a href="#">Carlsen 3342</a> | Asparagaceae     | <i>Echeandia</i>       | <i>texensis</i>                          | OL536883 | OL689976 | OL312217 | OL536467 |
| AI4GR15 | <a href="#">Carlsen 3087</a> | Asparagaceae     | <i>Reineckea</i>       | <i>carnea</i>                            | OL537082 | OL690136 | OL312086 | OL536630 |
| AI4GR46 | <a href="#">Carlsen 3097</a> | Asparagaceae     | <i>Eucharis</i>        | <i>bonplandii</i>                        | OL536895 | OL689985 | OL312096 | OL536479 |
| AI4GT95 | <a href="#">Carlsen 3109</a> | Asparagaceae     | <i>Dracaena</i>        | <i>thalioides</i>                        | OL536877 | OL689972 | OL312303 | OL536462 |
| AI4GU90 | <a href="#">Carlsen 3217</a> | Asparagaceae     | <i>Chlorophytum</i>    | <i>orchidastrum</i>                      | OL536817 | OL689930 | OL312269 | OL536414 |
| AI4GU74 | <a href="#">Carlsen 3229</a> | Asparagaceae     | <i>Hyacinthoides</i>   | <i>hispanica</i>                         | OL536942 | OL690026 | OL312280 | OL536517 |
| AI4GU65 | <a href="#">Carlsen 3246</a> | Asparagaceae     | <i>Albuca</i>          | <i>bracteata</i>                         | OL536736 | OL689867 | OL312293 | OL536351 |
| AI4GS77 | <a href="#">Carlsen 3172</a> | Asparagaceae     | <i>Veltheimia</i>      | <i>bracteata</i>                         | OL537158 | OL690197 | OL312252 | OL536695 |
| AI4GS97 | <a href="#">Carlsen 3160</a> | Asparagaceae     | <i>Ruscus</i>          | <i>aculeatus</i>                         | OL537095 | OL690146 | OL312246 | OL536641 |
| AI4GX85 | <a href="#">Carlsen 3458</a> | Asparagaceae     | <i>Asparagus</i>       | <i>horridus</i>                          | OL536758 | OL689885 | OL312363 | OL536370 |
| AL5LQ19 | <a href="#">Carlsen 3407</a> | Asparagaceae     | <i>Lachenalia</i>      | <i>orchioides</i> var. <i>orchioides</i> | OL536965 |          |          |          |
| AL5LR61 | <a href="#">Carlsen 3518</a> | Asparagaceae     | <i>Manfreda</i>        | <i>variegata</i>                         | OL536988 | OL690060 | OL312480 |          |
| AL5LR53 | <a href="#">Carlsen 3507</a> | Asparagaceae     | <i>Aspidistra</i>      | <i>locii</i>                             | OL536759 |          | OL312381 |          |
| AI4GS67 | <a href="#">Carlsen 3177</a> | Asphodelaceae    | <i>Gasteria</i>        | <i>obliqua</i>                           | OL536909 | OL689999 | OL312257 | OL536490 |
| AI4GU85 | <a href="#">Carlsen 3228</a> | Asphodelaceae    | <i>Aloe</i>            | <i>harlana</i>                           | OL536739 | OL689870 | OL312279 | OL536354 |
| AI4GY17 | <a href="#">Carlsen 3435</a> | Asphodelaceae    | <i>Haworthia</i>       | <i>emelyae</i>                           | OL536926 | OL690012 | OL312441 |          |
| AL5LQ21 | <a href="#">Carlsen 3408</a> | Asphodelaceae    | <i>Bulbine</i>         | <i>frutescens</i>                        | OL536787 | OL689906 | OL312431 | OL536390 |
| AI4GS31 | <a href="#">Carlsen 3196</a> | Aspleniaceae     | <i>Asplenium</i>       | <i>nidus</i>                             | OL536760 |          | OL312181 |          |
| AL5LR07 | <a href="#">Carlsen 3503</a> | Aspleniaceae     | <i>Asplenium</i>       | <i>onopteris</i>                         | OL536761 |          | OL312378 |          |
| AL5LR03 | <a href="#">Carlsen 3492</a> | Aspleniaceae     | <i>Ceterach</i>        | <i>officinarum</i>                       | OL536808 |          |          |          |
| AI4GU55 | <a href="#">Carlsen 3248</a> | Asteraceae       | <i>Pericallis</i>      | <i>webbii</i>                            | OL537041 | OL690108 | OL312140 | OL536603 |
| AI4GU81 | <a href="#">Carlsen 3224</a> | Asteraceae       | <i>Berlandiera</i>     | <i>subacaulis</i>                        | OL536775 | OL689896 | OL312275 | OL536381 |

|         |                              |               |                       |                      |          |          |          |          |
|---------|------------------------------|---------------|-----------------------|----------------------|----------|----------|----------|----------|
| AI4GT03 | <a href="#">Carlsen 3158</a> | Asteraceae    | <i>Argyranthemum</i>  | <i>lidi</i>          | OL536753 | OL689880 | OL312125 | OL536365 |
| AI4GW72 | <a href="#">Carlsen 3338</a> | Asteraceae    | <i>Coreopsis</i>      | <i>integrifolia</i>  | OL536832 | OL689940 |          | OL536427 |
| AI4GW48 | <a href="#">Carlsen 3326</a> | Asteraceae    | <i>Coreopsis</i>      | <i>integrifolia</i>  | OL536833 | OL689941 | OL312352 | OL536428 |
| AI4GV84 | <a href="#">Carlsen 3298</a> | Asteraceae    | <i>Cheirolophus</i>   | <i>falcisectus</i>   | OL536814 | OL689927 | OL312333 | OL536411 |
| AI4GT43 | <a href="#">Carlsen 3139</a> | Asteraceae    | <i>Helianthus</i>     | <i>winteri</i>       | OL536930 | OL690015 | OL312107 | OL536506 |
| AL5LS29 | <a href="#">Carlsen 3553</a> | Asteraceae    | <i>Ageratina</i>      | <i>modesta</i>       | OL536731 | OL689864 | OL312399 | OL536347 |
| AL5LQ57 | <a href="#">Carlsen 3470</a> | Asteraceae    | <i>Plagi</i>          | <i>flosculosus</i>   | OL537060 | OL690121 | OL312460 | OL536617 |
| AI4GY13 | <a href="#">Carlsen 3433</a> | Asteraceae    | <i>Sonchus</i>        | <i>acaulis</i>       | OL537121 | OL690168 | OL312440 | OL536665 |
| AI4GY11 | <a href="#">Carlsen 3432</a> | Asteraceae    | <i>Senecio</i>        | <i>cedrorum</i>      | OL537112 | OL690160 | OL312439 | OL536656 |
| AL5LQ89 | <a href="#">Carlsen 3486</a> | Asteraceae    | <i>Liatris</i>        | <i>gholsonii</i>     | OL536972 | OL690050 | OL312469 | OL536541 |
| AL5LQ25 | <a href="#">Carlsen 3410</a> | Asteraceae    | <i>Osteospermum</i>   | <i>sp.</i>           | OL537022 | OL690091 | OL312358 | OL536588 |
| AL5LR41 | <a href="#">Carlsen 3515</a> | Asteraceae    | <i>Cylindrocline</i>  | <i>commersonii</i>   | OL536845 | OL689949 | OL312385 | OL536437 |
| AI4GV19 | <a href="#">Carlsen 3261</a> | Begoniaceae   | <i>Begonia</i>        | <i>glandulosa</i>    | OL536773 | OL689895 | OL312295 | OL536379 |
| AI4GY25 | <a href="#">Carlsen 3439</a> | Berberidaceae | <i>Berberis</i>       | <i>aquifolium</i>    | OL536774 |          | OL312445 | OL536380 |
| AI4GS01 | <a href="#">Carlsen 3050</a> | Bignoniaceae  | <i>Crescentia</i>     | <i>portoricensis</i> | MH748819 | MT362753 | MT441730 | MH762921 |
| AI4GV71 | <a href="#">Carlsen 3287</a> | Bignoniaceae  | <i>Tecoma</i>         | <i>stans</i>         | OL537139 | OL690184 | OL312322 | OL536680 |
| AL5LS51 | <a href="#">Carlsen 3564</a> | Bignoniaceae  | <i>Oroxylum</i>       | <i>indicum</i>       | OL537020 | OL690088 | OL312406 | OL536585 |
| AL5LT09 | <a href="#">Carlsen 3583</a> | Bignoniaceae  | <i>Dolichandra</i>    | <i>dentata</i>       | OL536873 | OL689968 |          | OL536458 |
| AI4GU78 | <a href="#">Carlsen 3221</a> | Blechnaceae   | <i>Blechnum</i>       | <i>occidentale</i>   | OL536781 |          |          |          |
| AL5LS31 | <a href="#">Carlsen 3554</a> | Blechnaceae   | <i>Blechnum</i>       | <i>brasiliense</i>   | OL536780 |          |          |          |
| AI4GU71 | <a href="#">Carlsen 3232</a> | Boraginaceae  | <i>Trachystemon</i>   | <i>orientalis</i>    | OL537150 | OL690191 | OL312283 | OL536688 |
| AI4GV37 | <a href="#">Carlsen 3270</a> | Boraginaceae  | <i>Cordia</i>         | <i>boissieri</i>     | OL536831 | OL689939 | OL312194 | OL536426 |
| AI4GS51 | <a href="#">Carlsen 3185</a> | Boraginaceae  | <i>Echium</i>         | <i>angustifolium</i> | OL536885 | OL689978 | OL312264 | OL536469 |
| AL5LQ29 | <a href="#">Carlsen 3412</a> | Boraginaceae  | <i>Cryptantha</i>     | <i>crassipes</i>     | OL536838 | OL689945 | OL312434 | OL536432 |
| AL5LQ59 | <a href="#">Carlsen 3471</a> | Boraginaceae  | <i>Paracaryum</i>     | <i>rugulosum</i>     | OL537031 | OL690099 | OL312461 |          |
| AI4GS49 | <a href="#">Carlsen 3186</a> | Brassicaceae  | <i>Parolinia</i>      | <i>glabriuscula</i>  | OL537033 | OL690101 | OL312173 | OL536595 |
| AI4GU72 | <a href="#">Carlsen 3231</a> | Brassicaceae  | <i>Orychophragmus</i> | <i>violaceus</i>     | OL537021 | OL690090 | OL312282 | OL536587 |
| AI4GU64 | <a href="#">Carlsen 3245</a> | Brassicaceae  | <i>Nasturtium</i>     | <i>gambelii</i>      | OL537006 | OL690076 | OL312292 | OL536574 |

|         |                              |                |                        |                                          |          |          |          |          |
|---------|------------------------------|----------------|------------------------|------------------------------------------|----------|----------|----------|----------|
| AI4GU51 | <a href="#">Carlsen 3252</a> | Brassicaceae   | <i>Diplotaxis</i>      | <i>muralis</i>                           | OL536868 | OL689965 | OL312144 | OL536454 |
| AI4GU59 | <a href="#">Carlsen 3240</a> | Brassicaceae   | <i>Cardamine</i>       | <i>sp.</i>                               | OL536801 |          | OL312138 | OL536400 |
| AL5LQ32 | <a href="#">Carlsen 3414</a> | Brassicaceae   | <i>Matthiola</i>       | <i>maderensis</i>                        | OL536992 |          | OL312436 | OL536560 |
| AI4GU07 | <a href="#">Carlsen 3115</a> | Bromeliaceae   | <i>Aechmea</i>         | <i>gamosepala</i>                        | OL536723 | OL689858 | OL312172 |          |
| AI4GR23 | <a href="#">Carlsen 3080</a> | Bromeliaceae   | <i>Quesnelia</i>       | <i>imbricata</i>                         | OL537081 | OL690135 | OL312080 |          |
| AI4GS28 | <a href="#">Carlsen 3198</a> | Bromeliaceae   | <i>Neoregelia</i>      | <i>princeps</i>                          | OL537009 | OL690079 | OL312182 |          |
| AI4GW22 | <a href="#">Carlsen 3319</a> | Bromeliaceae   | <i>Neoglaziovia</i>    | <i>variegata</i>                         | OL537007 | OL690077 | OL312346 |          |
| AI4GV93 | <a href="#">Carlsen 3305</a> | Bromeliaceae   | <i>Pitcairnia</i>      | <i>bromeliifolia</i>                     | OL537057 | OL690118 | OL312297 |          |
| AI4GV29 | <a href="#">Carlsen 3266</a> | Bromeliaceae   | <i>Portea</i>          | <i>petropolitana</i> var. <i>extensa</i> | OL537066 | OL690126 | OL312191 |          |
| AI4GX36 | <a href="#">Carlsen 3373</a> | Bromeliaceae   | <i>Billbergia</i>      | <i>nutans</i>                            | OL536777 | OL689898 | OL312241 |          |
| AI4GU11 | <a href="#">Carlsen 3101</a> | Bromeliaceae   | <i>Aechmea</i>         | <i>weilbachii</i>                        | OL536724 | OL689859 | OL312100 |          |
| AI4GX00 | <a href="#">Carlsen 3355</a> | Bromeliaceae   | <i>Vriesea</i>         | <i>ospinae</i>                           | OL537160 | OL690199 | OL312225 |          |
| AL5LQ23 | <a href="#">Carlsen 3409</a> | Bromeliaceae   | <i>Puya</i>            | <i>coerulea</i>                          | OL537078 |          | OL312432 |          |
| AL5LR33 | <a href="#">Carlsen 3517</a> | Bromeliaceae   | <i>Androlepis</i>      | <i>skinneri</i>                          | OL536744 |          | OL312387 |          |
| AL5LR57 | <a href="#">Carlsen 3509</a> | Bromeliaceae   | <i>Cryptanthus</i>     | <i>bromelioides</i>                      | OL536839 |          | OL312476 |          |
| AL5LR75 | <a href="#">Carlsen 3526</a> | Burseraceae    | <i>Protium</i>         | <i>beandou</i>                           | OL537067 | OL690127 | OL312485 | OL536623 |
| AL5LR65 | <a href="#">Carlsen 3522</a> | Burseraceae    | <i>Canarium</i>        | <i>bullatum</i>                          | OL536798 | OL689915 |          |          |
| AI4GS45 | <a href="#">Carlsen 3188</a> | Buxaceae       | <i>Buxus</i>           | <i>balearica</i>                         | OL536789 | OL689907 | OL312175 | OL536391 |
| AI4GT23 | <a href="#">Carlsen 3149</a> | Buxaceae       | <i>Sarcococca</i>      | <i>ruscifolia</i>                        | OL537103 | OL690153 | OL312116 | OL536648 |
| AI4GW13 | <a href="#">Carlsen 3315</a> | Cactaceae      | <i>Weberocereus</i>    | <i>bradei</i>                            | OL537162 | OL690200 | OL312343 | OL536698 |
| AI4GT87 | <a href="#">Carlsen 3118</a> | Cactaceae      | <i>Pseudorhipsalis</i> | <i>ramulosa</i>                          | OL537071 | OL690130 | OL312307 | OL536625 |
| AI4GY05 | <a href="#">Carlsen 3449</a> | Cactaceae      | <i>Stenocereus</i>     | <i>eruca</i>                             | OL537129 | OL690175 | OL312449 |          |
| AL5LS71 | <a href="#">Carlsen 3579</a> | Cactaceae      | <i>Hattoria</i>        | <i>salicornioides</i>                    | OL536925 | OL690011 | OL312416 |          |
| AL5LS55 | <a href="#">Carlsen 3566</a> | Cactaceae      | <i>Pseudorhipsalis</i> | <i>amazonica</i>                         | OL537070 | OL690129 | OL312408 |          |
| AL5LQ87 | <a href="#">Carlsen 3485</a> | Cactaceae      | <i>Harrisia</i>        | <i>pomanensis</i>                        | OL536924 | OL690010 | OL312371 |          |
| AL5LS67 | <a href="#">Carlsen 3572</a> | Calophyllaceae | <i>Mammea</i>          | <i>punctata</i>                          | OL536986 | OL690059 | OL312497 | OL536556 |
| AI4GX79 | <a href="#">Carlsen 3390</a> | Calycanthaceae | <i>Chimonanthus</i>    | <i>praecox</i>                           | OL536815 | OL689928 | OL312243 | OL536412 |

|         |                               |                |                      |                      |          |          |          |          |
|---------|-------------------------------|----------------|----------------------|----------------------|----------|----------|----------|----------|
| AI4GV78 | <a href="#">Carlsen 3292</a>  | Campanulaceae  | <i>Campanula</i>     | <i>peregrina</i>     | OL536796 | OL689913 | OL312327 | OL536396 |
| AL5LQ31 | <a href="#">Carlsen 3413</a>  | Campanulaceae  | <i>Canarina</i>      | <i>canariensis</i>   | OL536797 | OL689914 | OL312435 | OL536397 |
| AL5LR59 | <a href="#">Carlsen 3519</a>  | Campanulaceae  | <i>Nesocodon</i>     | <i>mauritanus</i>    | OL537010 | OL690080 | OL312481 | OL536575 |
| AL5LR25 | <a href="#">Carlsen 3496</a>  | Campanulaceae  | <i>Azorina</i>       | <i>vidalii</i>       | OL536766 | OL689890 | OL312373 | OL536375 |
| AI4GV25 | <a href="#">Carlsen 3264</a>  | Cannaceae      | <i>Canna</i>         | <i>indica</i>        | OL536799 | OL689916 | OL312189 | OL536398 |
| AI4GU22 | <a href="#">Carlsen 3259</a>  | Capparaceae    | <i>Capparis</i>      | <i>orientalis</i>    | OL536800 | OL689917 | OL312151 | OL536399 |
| AI4GV39 | <a href="#">Carlsen 3280</a>  | Caprifoliaceae | <i>Lonicera</i>      | <i>acuminata</i>     | OL536976 | OL690053 | OL312203 | OL536545 |
| AI4GX24 | <a href="#">Carlsen 3365</a>  | Caricaceae     | <i>Vasconcellea</i>  | <i>pubescens</i>     | OL537157 | OL690196 | OL312235 | OL536694 |
| AL5LR79 | <a href="#">Carlsen 3530</a>  | Celastraceae   | <i>Cassine</i>       | <i>aethiopica</i>    | OL536806 |          | OL312486 | OL536404 |
| AI4GS89 | <a href="#">Carlsen 3166</a>  | Cistaceae      | <i>Cistus</i>        | <i>monspeliensis</i> | OL536820 |          |          | OL536416 |
| AI4GU61 | <a href="#">Carlsen 3242</a>  | Cistaceae      | <i>Cistus</i>        | <i>creticus</i>      | OL536819 |          |          | OL536415 |
| AL5LQ65 | <a href="#">Carlsen 3474</a>  | Cistaceae      | <i>Fumana</i>        | <i>ericoides</i>     | OL536907 | OL689997 | OL312464 | OL536488 |
| AI4GS43 | <a href="#">Carlsen 3189</a>  | Cleomaceae     | <i>Peritoma</i>      | <i>arborea</i>       | OL537042 | OL690109 | OL312176 | OL536604 |
| AI4GW98 | <a href="#">Carlsen 3351</a>  | Clusiaceae     | <i>Clusia</i>        | <i>sp.</i>           | OL536826 |          | OL312224 | OL536421 |
| AI4GV65 | <a href="#">Carlsen 3276</a>  | Combretaceae   | <i>Combretum</i>     | <i>indicum</i>       | OL536830 | OL689938 | OL312199 | OL536425 |
| AG5NO85 | <a href="#">Carlsen 3042</a>  | Commelinaceae  | <i>Murdannia</i>     | <i>bracteata</i>     | MH748823 | MT362761 |          | MT358291 |
| AI4GR29 | <a href="#">Carlsen 3083</a>  | Commelinaceae  | <i>Callisia</i>      | <i>fragrans</i>      | OL536794 | OL689911 | OL312082 |          |
| AI4GR30 | <a href="#">Carlsen 3083b</a> | Commelinaceae  | <i>Callisia</i>      | <i>fragrans</i>      | OL536795 | OL689912 | OL312083 |          |
| AI4GT55 | <a href="#">Carlsen 3120</a>  | Commelinaceae  | <i>Dichorisandra</i> | <i>thyrsiflora</i>   | OL536861 |          | OL312309 | OL536449 |
| AI4GT79 | <a href="#">Carlsen 3132</a>  | Commelinaceae  | <i>Palisota</i>      | <i>barteri</i>       | OL537028 | OL690096 | OL312318 |          |
| AI4GV57 | <a href="#">Carlsen 3273</a>  | Commelinaceae  | <i>Siderasis</i>     | <i>fuscata</i>       | OL537117 |          | OL312197 | OL536661 |
| AL5LR37 | <a href="#">Carlsen 3516</a>  | Commelinaceae  | <i>Geogenanthus</i>  | <i>poepigii</i>      | OL536912 |          | OL312386 |          |
| AL5LT01 | <a href="#">Carlsen 3576</a>  | Commelinaceae  | <i>Tradescantia</i>  | <i>spathacea</i>     | OL537151 |          |          |          |
| AI4GU73 | <a href="#">Carlsen 3230</a>  | Cornaceae      | <i>Davidia</i>       | <i>involucrata</i>   | OL536851 | OL689953 | OL312281 | OL536441 |
| AI4GR69 | <a href="#">Carlsen 3072</a>  | Costaceae      | <i>Tapeinochilos</i> | <i>ananassae</i>     | MH748826 | MT362771 |          | MT358298 |
| AI4GQ49 | <a href="#">Carlsen 3036</a>  | Costaceae      | <i>Monocostus</i>    | <i>uniflorus</i>     | MH748825 | MT362760 |          |          |
| AI4GT27 | <a href="#">Carlsen 3147</a>  | Costaceae      | <i>Costus</i>        | <i>osae</i>          | OL536834 |          |          |          |
| AI4GS41 | <a href="#">Carlsen 3190</a>  | Crassulaceae   | <i>Kalanchoe</i>     | <i>sp.</i>           | OL536961 |          | OL312177 | OL536532 |



|         |                              |                 |                      |                        |          |          |          |          |
|---------|------------------------------|-----------------|----------------------|------------------------|----------|----------|----------|----------|
| AI4GS39 | <a href="#">Carlsen 3191</a> | Crassulaceae    | <i>Kalanchoe</i>     | <i>beharensis</i>      | OL536960 |          |          |          |
| AI4GV87 | <a href="#">Carlsen 3301</a> | Crassulaceae    | <i>Dudleya</i>       | <i>farinosa</i>        | OL536881 |          | OL312335 | OL536465 |
| AL5LR05 | <a href="#">Carlsen 3500</a> | Crassulaceae    | <i>Aeonium</i>       | <i>percarneum</i>      | OL536725 |          | OL312474 | OL536340 |
| AL5LQ15 | <a href="#">Carlsen 3405</a> | Crassulaceae    | <i>Crassula</i>      | <i>ovata</i>           |          |          | OL312356 | OL536429 |
| AL5LQ83 | <a href="#">Carlsen 3483</a> | Crassulaceae    | <i>Aichryson</i>     | <i>tortuosum</i>       | OL536735 |          | OL312369 | OL536350 |
| AI4GW07 | <a href="#">Carlsen 3312</a> | Cucurbitaceae   | <i>Gurania</i>       | <i>sp.</i>             | OL536919 | OL690005 | OL312341 | OL536498 |
| AL5LQ79 | <a href="#">Carlsen 3481</a> | Cucurbitaceae   | <i>Xerosicyos</i>    | <i>danguyi</i>         | OL537165 | OL690203 | OL312468 | OL536701 |
| AI4GS30 | <a href="#">Carlsen 3197</a> | Cunoniaceae     | <i>Davidsonia</i>    | <i>pruriens</i>        | OL536852 | OL689954 |          | OL536442 |
| AI4GY21 | <a href="#">Carlsen 3437</a> | Cupressaceae    | <i>Taiwania</i>      | <i>cryptomerioides</i> | OL537138 |          | OL312443 | OL536679 |
| AI4GX91 | <a href="#">Carlsen 3455</a> | Cyatheaceae     | <i>Cyathea</i>       | <i>australis</i>       | OL536842 |          | OL312453 | OL536435 |
| AI4GV23 | <a href="#">Carlsen 3263</a> | Cycadaceae      | <i>Zamia</i>         | <i>pumila</i>          | OL537171 |          | OL312188 | OL536706 |
| AI4GW96 | <a href="#">Carlsen 3350</a> | Cycadaceae      | <i>Zamia</i>         | <i>fischeri</i>        | OL537170 |          |          | OL536705 |
| AG5NO75 | <a href="#">Carlsen 3040</a> | Cyclanthaceae   | <i>Chorigyne</i>     | <i>pendula</i>         | MH748827 | MT362751 | MH749325 |          |
| AI4GR07 | <a href="#">Carlsen 3059</a> | Cyclanthaceae   | <i>Ludovia</i>       | <i>lancifolia</i>      | MH748828 | MH748881 | MH749326 | MT358288 |
| AI4GT73 | <a href="#">Carlsen 3129</a> | Cyclanthaceae   | <i>Carludovica</i>   | <i>drudei</i>          | OL536803 | OL689919 | OL312315 | OL536402 |
| AI4GW18 | <a href="#">Carlsen 3317</a> | Cyclanthaceae   | <i>Carludovica</i>   | <i>palmata</i>         | OL536804 | OL689920 | OL312344 | OL536403 |
| AL5LR45 | <a href="#">Carlsen 3513</a> | Cyclanthaceae   | <i>Cyclanthus</i>    | <i>bipartitus</i>      | OL536844 | OL689948 | OL312478 |          |
| AL5LS16 | <a href="#">Carlsen 3546</a> | Cyclanthaceae   | <i>Dicranopygium</i> | <i>wallisii</i>        | OL536863 | OL689962 | OL312395 | OL536450 |
| AI4GT33 | <a href="#">Carlsen 3144</a> | Cyperaceae      | <i>Rhynchospora</i>  | <i>latifolia</i>       | OL537089 | OL690141 | OL312112 | OL536636 |
| AI4GS87 | <a href="#">Carlsen 3167</a> | Cyperaceae      | <i>Cyperus</i>       | <i>involucratus</i>    | OL536847 | OL689951 | OL312249 | OL536439 |
| AL5LS15 | <a href="#">Carlsen 3543</a> | Dicksoniaceae   | <i>Dicksonia</i>     | <i>fibrosa</i>         | OL536862 |          | OL312494 |          |
| AI4GY03 | <a href="#">Carlsen 3448</a> | Didiereaceae    | <i>Alluaudia</i>     | <i>humbertii</i>       | OL536738 | OL689869 |          | OL536353 |
| AI4GV43 | <a href="#">Carlsen 3283</a> | Droseraceae     | <i>Drosera</i>       | <i>capensis</i>        | OL536878 | OL689973 |          | OL536463 |
| AI4GS17 | <a href="#">Carlsen 3209</a> | Dryopteridaceae | <i>Tectaria</i>      | <i>gemmifera</i>       | OL537140 |          | OL312132 |          |
| AL5LT24 | <a href="#">Carlsen 3598</a> | Dryopteridaceae | <i>Rumohra</i>       | <i>adiantiformis</i>   | OL537094 |          |          |          |
| AI4GY09 | <a href="#">Carlsen 3431</a> | Dryopteridaceae | <i>Cyrtomium</i>     | <i>falcatum</i>        | OL536849 |          | OL312438 |          |
| AL5LT27 | <a href="#">Carlsen 3601</a> | Dryopteridaceae | <i>Diplazium</i>     | <i>esculentum</i>      | OL536867 |          | OL312430 |          |
| AL5LS83 | <a href="#">Carlsen 3591</a> | Dryopteridaceae | <i>Cyrtomium</i>     | <i>falcatum</i>        | OL536848 |          | OL312422 |          |

|         |                              |                 |                       |                      |          |          |          |          |
|---------|------------------------------|-----------------|-----------------------|----------------------|----------|----------|----------|----------|
| AL5LQ37 | <a href="#">Carlsen 3460</a> | Dryopteridaceae | <i>Arachniodes</i>    | <i>sp.</i>           | OL536749 |          |          |          |
| AI4GT47 | <a href="#">Carlsen 3137</a> | Ebenaceae       | <i>Diospyros</i>      | <i>rhombifolia</i>   | OL536866 | OL689964 | OL312105 | OL536453 |
| AI4GW01 | <a href="#">Carlsen 3309</a> | Ericaceae       | <i>Macleania</i>      | <i>rupestris</i>     | OL536984 |          | OL312299 | OL536553 |
| AL5LS61 | <a href="#">Carlsen 3569</a> | Ericaceae       | <i>Cavendishia</i>    | <i>grandifolia</i>   |          |          | OL312410 | OL536405 |
| AL5LS47 | <a href="#">Carlsen 3562</a> | Ericaceae       | <i>Anthopterus</i>    | <i>schultzeae</i>    |          |          |          | OL536359 |
| AL5LQ39 | <a href="#">Carlsen 3461</a> | Ericaceae       | <i>Arctostaphylos</i> | <i>tomentosa</i>     | OL536750 |          | OL312365 | OL536362 |
| AL5LQ69 | <a href="#">Carlsen 3476</a> | Ericaceae       | <i>Erica</i>          | <i>scoparia</i>      | OL536891 | OL689982 |          | OL536475 |
| AL5LS63 | <a href="#">Carlsen 3570</a> | Ericaceae       | <i>Disterigma</i>     | <i>rimbachii</i>     | OL536870 |          |          | OL536455 |
| AI4GV73 | <a href="#">Carlsen 3289</a> | Eriocaulaceae   | <i>Lachnocaulon</i>   | <i>anceps</i>        | OL536966 |          | OL312324 |          |
| AI4GW64 | <a href="#">Carlsen 3334</a> | Euphorbiaceae   | <i>Jatropha</i>       | <i>multifida</i>     | OL536956 |          | OL312210 | OL536528 |
| AI4GT77 | <a href="#">Carlsen 3131</a> | Euphorbiaceae   | <i>Acalypha</i>       | <i>hispida</i>       | OL536712 | OL689851 | OL312317 | OL536332 |
| AI4GU88 | <a href="#">Carlsen 3215</a> | Euphorbiaceae   | <i>Dalechampia</i>    | <i>spathulata</i>    | OL536850 | OL689952 | OL312268 | OL536440 |
| AI4GS55 | <a href="#">Carlsen 3183</a> | Euphorbiaceae   | <i>Euphorbia</i>      | <i>dendroides</i>    | OL536898 | OL689988 | OL312262 | OL536481 |
| AI4GU54 | <a href="#">Carlsen 3249</a> | Euphorbiaceae   | <i>Ricinus</i>        | <i>communis</i>      | OL537090 | OL690142 | OL312141 | OL536637 |
| AI4GW26 | <a href="#">Carlsen 3321</a> | Eupomatiaceae   | <i>Eupomatia</i>      | <i>laurina</i>       | OL536899 | OL689989 | OL312348 | OL536482 |
| AI4GR57 | <a href="#">Carlsen 3066</a> | Fabaceae        | <i>Codariocalyx</i>   | <i>motorius</i>      | MH748830 | MT362752 | MH749328 | MH762924 |
| AI4GW11 | <a href="#">Carlsen 3314</a> | Fabaceae        | <i>Mimosa</i>         | <i>pudica</i>        | OL537000 | OL690069 | OL312342 | OL536568 |
| AI4GX59 | <a href="#">Carlsen 3381</a> | Fabaceae        | <i>Saraca</i>         | <i>thaipingensis</i> | OL537102 | OL690152 | OL312161 |          |
| AI4GS85 | <a href="#">Carlsen 3168</a> | Fabaceae        | <i>Indigofera</i>     | <i>australis</i>     | OL536950 | OL690034 | OL312250 | OL536523 |
| AI4GU87 | <a href="#">Carlsen 3214</a> | Fabaceae        | <i>Calliandra</i>     | <i>tergemina</i>     | OL536793 |          | OL312267 | OL536395 |
| AI4GR38 | <a href="#">Carlsen 3093</a> | Fabaceae        | <i>Strongylodon</i>   | <i>macrobotrys</i>   | OL537134 | OL690180 | OL312092 | OL536675 |
| AI4GR17 | <a href="#">Carlsen 3088</a> | Fabaceae        | <i>Teline</i>         | <i>nervosa</i>       | OL537141 | OL690185 | OL312087 | OL536681 |
| AI4GT37 | <a href="#">Carlsen 3142</a> | Fabaceae        | <i>Hardenbergia</i>   | <i>violacea</i>      | OL536923 | OL690009 | OL312110 | OL536501 |
| AI4GU45 | <a href="#">Carlsen 3258</a> | Fabaceae        | <i>Adenanthera</i>    | <i>sp.</i>           | OL536719 | OL689856 | OL312150 | OL536338 |
| AI4GS81 | <a href="#">Carlsen 3170</a> | Fabaceae        | <i>Gastrolobium</i>   | <i>bilobum</i>       | OL536910 | OL690000 |          | OL536491 |
| AI4GS47 | <a href="#">Carlsen 3187</a> | Fabaceae        | <i>Lotus</i>          | <i>arinagensis</i>   | OL536977 | OL690054 | OL312174 | OL536546 |
| AI4GW82 | <a href="#">Carlsen 3343</a> | Fabaceae        | <i>Acacia</i>         | <i>beckleri</i>      | OL536711 | OL689850 | OL312218 | OL536331 |
| AI4GR19 | <a href="#">Carlsen 3089</a> | Fabaceae        | <i>Kennedia</i>       | <i>beckxiana</i>     | OL536962 | OL690043 | OL312088 | OL536533 |

|         |                              |               |                      |                      |          |          |          |          |
|---------|------------------------------|---------------|----------------------|----------------------|----------|----------|----------|----------|
| AI4GS53 | <a href="#">Carlsen 3184</a> | Fabaceae      | <i>Lupinus</i>       | <i>arboreus</i>      | OL536979 | OL690056 | OL312263 | OL536548 |
| AI4GS24 | <a href="#">Carlsen 3202</a> | Fabaceae      | <i>Caesalpinia</i>   | <i>pulcherrima</i>   | OL536790 | OL689908 | OL312184 | OL536392 |
| AI4GS83 | <a href="#">Carlsen 3169</a> | Fabaceae      | <i>Senna</i>         | <i>pleurocarpa</i>   | OL537114 | OL690162 | OL312251 | OL536658 |
| AI4GX20 | <a href="#">Carlsen 3362</a> | Fabaceae      | <i>Senna</i>         | <i>fruticosa</i>     | OL537113 | OL690161 | OL312232 | OL536657 |
| AI4GT51 | <a href="#">Carlsen 3134</a> | Fabaceae      | <i>Inga</i>          | <i>feuillei</i>      | OL536951 | OL690035 | OL312320 | OL536524 |
| AL5LR23 | <a href="#">Carlsen 3497</a> | Fabaceae      | <i>Retama</i>        | <i>monosperma</i>    | OL537083 | OL690137 | OL312374 | OL536631 |
| AL5LT03 | <a href="#">Carlsen 3595</a> | Fabaceae      | <i>Brownea</i>       | <i>macrophylla</i>   | OL536784 | OL689903 | OL312426 | OL536387 |
| AL5LQ13 | <a href="#">Carlsen 3404</a> | Fabaceae      | <i>Codariocalyx</i>  | <i>motorius</i>      | OL536828 | OL689936 | OL312355 | OL536423 |
| AL5LR83 | <a href="#">Carlsen 3532</a> | Fabaceae      | <i>Hymenaea</i>      | <i>verrucosa</i>     | OL536944 | OL690028 | OL312487 |          |
| AL5LQ85 | <a href="#">Carlsen 3484</a> | Fabaceae      | <i>Bituminaria</i>   | <i>bituminosa</i>    | OL536779 | OL689900 | OL312370 | OL536384 |
| AL5LR67 | <a href="#">Carlsen 3524</a> | Fabaceae      | <i>Delonix</i>       | <i>regia</i>         | OL536854 | OL689956 | OL312483 |          |
| AI4GW78 | <a href="#">Carlsen 3340</a> | Gentianaceae  | <i>Exacum</i>        | <i>affine</i>        | OL536900 | OL689990 | OL312215 | OL536483 |
| AI4GT07 | <a href="#">Carlsen 3157</a> | Geraniaceae   | <i>Geranium</i>      | <i>reuteri</i>       | OL536913 |          | OL312124 | OL536493 |
| AI4GS57 | <a href="#">Carlsen 3182</a> | Geraniaceae   | <i>Pelargonium</i>   | <i>tabulare</i>      | OL537038 | OL690106 | OL312261 | OL536600 |
| AI4GR75 | <a href="#">Carlsen 3069</a> | Gesneriaceae  | <i>Gesneria</i>      | <i>pedunculosa</i>   | MH748831 | MT362756 | MH749329 | MH762925 |
| AI4GT75 | <a href="#">Carlsen 3130</a> | Gesneriaceae  | <i>Microchirita</i>  | <i>lavandulacea</i>  | OL536998 | OL690068 | OL312316 | OL536567 |
| AI4GV99 | <a href="#">Carlsen 3308</a> | Gesneriaceae  | <i>Kohleria</i>      | <i>tubiflora</i>     | OL536964 | OL690045 | OL312339 | OL536535 |
| AI4GW05 | <a href="#">Carlsen 3311</a> | Gesneriaceae  | <i>Aeschynanthus</i> | <i>pulcher</i>       | OL536727 | OL689861 | OL312340 | OL536342 |
| AI4GX16 | <a href="#">Carlsen 3360</a> | Gesneriaceae  | <i>Seemannia</i>     | <i>sylvatica</i>     | OL537110 | OL690159 | OL312230 | OL536654 |
| AI4GV55 | <a href="#">Carlsen 3272</a> | Gesneriaceae  | <i>Aeschynanthus</i> | <i>obconicus</i>     | OL536726 | OL689860 | OL312196 | OL536341 |
| AI4GV45 | <a href="#">Carlsen 3284</a> | Gesneriaceae  | <i>Sinningia</i>     | <i>eumorpha</i>      | OL537118 | OL690165 | OL312205 | OL536662 |
| AL5LT21 | <a href="#">Carlsen 3578</a> | Gnetaceae     | <i>Gnetum</i>        | <i>gnemon</i>        | OL536915 |          | OL312415 | OL536495 |
| AI4GT39 | <a href="#">Carlsen 3141</a> | Haemodoraceae | <i>Anigozanthos</i>  | <i>viridis</i>       | OL536745 | OL689874 | OL312109 | OL536358 |
| AI4GS19 | <a href="#">Carlsen 3206</a> | Heliconiaceae | <i>Heliconia</i>     | <i>aurantiaca</i>    | OL536931 | OL690016 | OL312129 | OL536507 |
| AI4GT41 | <a href="#">Carlsen 3140</a> | Helwingiaceae | <i>Helwingia</i>     | <i>chinensis</i>     | OL536932 | OL690017 | OL312108 | OL536508 |
| AI4GV75 | <a href="#">Carlsen 3288</a> | Hydrangeaceae | <i>Decumaria</i>     | <i>barbara</i>       | OL536853 | OL689955 | OL312323 | OL536443 |
| AL5LQ93 | <a href="#">Carlsen 3488</a> | Hydrangeaceae | <i>Schizophragma</i> | <i>integrifolium</i> | OL537108 | OL690157 | OL312470 | OL536653 |
| AI4GS69 | <a href="#">Carlsen 3176</a> | Iridaceae     | <i>Sparaxis</i>      | <i>villosa</i>       | OL537123 | OL690170 | OL312256 | OL536667 |

|         |                              |                  |                      |                        |          |          |          |          |
|---------|------------------------------|------------------|----------------------|------------------------|----------|----------|----------|----------|
| AI4GS71 | <a href="#">Carlsen 3175</a> | Iridaceae        | <i>Ferraria</i>      | <i>crispa</i>          | OL536902 | OL689992 | OL312255 |          |
| AI4GW76 | <a href="#">Carlsen 3341</a> | Iridaceae        | <i>Sisyrinchium</i>  | <i>radicatum</i>       | OL537119 | OL690166 | OL312216 | OL536663 |
| AI4GV77 | <a href="#">Carlsen 3291</a> | Iridaceae        | <i>Diates</i>        | <i>iridioides</i>      | OL536864 | OL689963 | OL312326 | OL536451 |
| AI4GT49 | <a href="#">Carlsen 3136</a> | Iridaceae        | <i>Iris</i>          | <i>japonica</i>        | OL536952 | OL690036 | OL312104 | OL536525 |
| AI4GS75 | <a href="#">Carlsen 3173</a> | Iridaceae        | <i>Babiana</i>       | <i>thunbergii</i>      | OL536768 | OL689892 | OL312253 | OL536376 |
| AL5LQ91 | <a href="#">Carlsen 3487</a> | Iridaceae        | <i>Orthrosanthus</i> | <i>chimboracensis</i>  |          | OL690089 |          | OL536586 |
| AI4GY01 | <a href="#">Carlsen 3450</a> | Iridaceae        | <i>Chasmanthe</i>    | <i>floribunda</i>      | OL536813 | OL689926 | OL312450 |          |
| AI4GY19 | <a href="#">Carlsen 3436</a> | Iridaceae        | <i>Babiana</i>       | <i>rubrocyanea</i>     | OL536767 | OL689891 | OL312442 |          |
| AL5LS81 | <a href="#">Carlsen 3593</a> | Iridaceae        | <i>Neomarica</i>     | <i>northiana</i>       | OL537008 | OL690078 | OL312424 |          |
| AI4GX99 | <a href="#">Carlsen 3451</a> | Iridaceae        | <i>Aristea</i>       | <i>platycaulis</i>     |          | OL689881 | OL312361 |          |
| AI4GV80 | <a href="#">Carlsen 3294</a> | Lamiaceae        | <i>Teucrium</i>      | <i>marum</i>           | OL537143 | OL690187 | OL312329 | OL536683 |
| AI4GW28 | <a href="#">Carlsen 3322</a> | Lamiaceae        | <i>Ocimum</i>        | <i>tenuiflorum</i>     | OL537014 | OL690083 | OL312349 | OL536579 |
| AI4GS10 | <a href="#">Carlsen 3207</a> | Lamiaceae        | <i>Pogostemon</i>    | <i>heyneanus</i>       | OL537064 | OL690124 | OL312130 | OL536621 |
| AI4GV79 | <a href="#">Carlsen 3293</a> | Lamiaceae        | <i>Thymus</i>        | <i>camphoratus</i>     | OL537148 | OL690190 | OL312328 | OL536687 |
| AI4GS93 | <a href="#">Carlsen 3164</a> | Lamiaceae        | <i>Rosmarinus</i>    | <i>officinalis</i>     | OL537092 | OL690144 | OL312128 | OL536639 |
| AI4GR31 | <a href="#">Carlsen 3090</a> | Lamiaceae        | <i>Tetradenia</i>    | <i>riparia</i>         | OL537142 | OL690186 | OL312089 | OL536682 |
| AI4GX28 | <a href="#">Carlsen 3363</a> | Lamiaceae        | <i>Holmskioldia</i>  | <i>sanguinea</i>       | OL536940 | OL690024 | OL312233 | OL536515 |
| AI4GR40 | <a href="#">Carlsen 3094</a> | Lamiaceae        | <i>Clerodendrum</i>  | <i>thomsoniae</i>      | OL536823 | OL689933 | OL312093 | OL536419 |
| AI4GU80 | <a href="#">Carlsen 3223</a> | Lamiaceae        | <i>Salvia</i>        | <i>hierosolymitana</i> | OL537100 | OL690151 | OL312274 | OL536646 |
| AI4GX61 | <a href="#">Carlsen 3382</a> | Lamiaceae        | <i>Clerodendrum</i>  | <i>quadriloculare</i>  | OL536822 | OL689932 | OL312162 | OL536418 |
| AL5LQ67 | <a href="#">Carlsen 3475</a> | Lamiaceae        | <i>Phlomis</i>       | <i>chrysophylla</i>    | OL537045 | OL690112 | OL312465 | OL536607 |
| AL5LQ53 | <a href="#">Carlsen 3468</a> | Lamiaceae        | <i>Mentha</i>        | <i>requienii</i>       | OL536996 | OL690066 | OL312458 | OL536565 |
| AI4GT31 | <a href="#">Carlsen 3145</a> | Lardizabalaceae  | <i>Holboellia</i>    | <i>coriacea</i>        | OL536939 | OL690023 | OL312113 | OL536514 |
| AI4GT11 | <a href="#">Carlsen 3155</a> | Lauraceae        | <i>Machilus</i>      | <i>thunbergii</i>      | OL536983 | OL690057 | OL312122 | OL536552 |
| AL5LS25 | <a href="#">Carlsen 3551</a> | Lecythidaceae    | <i>Gustavia</i>      | <i>superba</i>         | OL536920 | OL690006 | OL312397 |          |
| AI4GT19 | <a href="#">Carlsen 3152</a> | Lentibulariaceae | <i>Pinguicula</i>    | <i>primuliflora</i>    | OL537051 | OL690116 | OL312119 | OL536611 |
| AG5NO83 | <a href="#">Carlsen 3041</a> | Lowiaceae        | <i>Orchidantha</i>   | <i>maxillarioides</i>  | MH748833 | MT362763 | MH749330 |          |
| AL5LR27 | <a href="#">Carlsen 3495</a> | Lycopodiaceae    | <i>Lycopodiella</i>  | <i>alopecuroides</i>   | OL536980 |          | OL312372 | OL536549 |

|         |                              |                 |                     |                                  |          |          |          |          |
|---------|------------------------------|-----------------|---------------------|----------------------------------|----------|----------|----------|----------|
| AI4GT01 | <a href="#">Carlsen 3162</a> | Lythraceae      | <i>Punica</i>       | <i>granatum</i>                  | OL537077 | OL690133 | OL312126 | OL536628 |
| AL5LR99 | <a href="#">Carlsen 3538</a> | Lythraceae      | <i>Koehneria</i>    | <i>madagascariensis</i>          | OL536963 | OL690044 | OL312390 | OL536534 |
| AI4GQ61 | <a href="#">Carlsen 3029</a> | Malpighiaceae   | <i>Malpighia</i>    | <i>coccigera</i>                 | MH748834 | MT362759 | MH749331 | MH762927 |
| AL5LS57 | <a href="#">Carlsen 3567</a> | Malpighiaceae   | <i>Mascagnia</i>    | <i>macroptera</i>                | OL536991 | OL690063 | OL312409 | OL536559 |
| AI4GR05 | <a href="#">Carlsen 3062</a> | Malvaceae       | <i>Alyogyne</i>     | <i>huegelii</i>                  | MH748835 | MT362746 | MH749332 | MH762928 |
| AI4GU89 | <a href="#">Carlsen 3216</a> | Malvaceae       | <i>Theobroma</i>    | <i>cacao</i>                     | OL537146 | OL690188 |          | OL536685 |
| AI4GW03 | <a href="#">Carlsen 3310</a> | Malvaceae       | <i>Pachira</i>      | <i>insignis</i>                  | OL537024 | OL690093 | OL312300 | OL536589 |
| AI4GV95 | <a href="#">Carlsen 3306</a> | Malvaceae       | <i>Quararibea</i>   | <i>pumila</i>                    | OL537080 | OL690134 | OL312298 | OL536629 |
| AI4GR36 | <a href="#">Carlsen 3092</a> | Malvaceae       | <i>Hibiscus</i>     | <i>schizopetalus</i>             | OL536936 | OL690020 | OL312091 | OL536511 |
| AI4GT89 | <a href="#">Carlsen 3119</a> | Malvaceae       | <i>Pavonia</i>      | <i>multiflora</i>                | OL537037 | OL690105 | OL312308 | OL536599 |
| AI4GU56 | <a href="#">Carlsen 3247</a> | Malvaceae       | <i>Sphaeralcea</i>  | <i>ambigua</i>                   | OL537126 | OL690173 | OL312139 | OL536670 |
| AI4GX22 | <a href="#">Carlsen 3366</a> | Malvaceae       | <i>Herrania</i>     | <i>purpurea</i>                  | OL536934 | OL690018 | OL312236 | OL536509 |
| AI4GS25 | <a href="#">Carlsen 3201</a> | Malvaceae       | <i>Dombeya</i>      | <i>wallichii</i>                 | OL536874 | OL689969 | OL312183 | OL536459 |
| AL5LR89 | <a href="#">Carlsen 3528</a> | Malvaceae       | <i>Grewia</i>       | <i>sp.</i>                       | OL536918 | OL690004 | OL312389 | OL536497 |
| AL5LR95 | <a href="#">Carlsen 3536</a> | Malvaceae       | <i>Hibiscus</i>     | <i>ferrugineus</i>               | OL536935 | OL690019 | OL312491 | OL536510 |
| AL5LR01 | <a href="#">Carlsen 3491</a> | Malvaceae       | <i>Sidalcea</i>     | <i>oregana subsp. hydrophila</i> | OL537116 | OL690164 | OL312472 | OL536660 |
| AI4GR93 | <a href="#">Carlsen 3053</a> | Marantaceae     | <i>Ataenidia</i>    | <i>conferta</i>                  | MH748837 |          |          | MT358281 |
| AG5NO69 | <a href="#">Carlsen 3033</a> | Marantaceae     | <i>Goepfertia</i>   | <i>loeseneri</i>                 | MH748838 | MT362757 |          | MH762930 |
| AI4GR25 | <a href="#">Carlsen 3081</a> | Marantaceae     | <i>Ctenanthe</i>    | <i>burle-marxii</i>              | OL536840 | OL689946 |          | OL536433 |
| AI4GR42 | <a href="#">Carlsen 3095</a> | Marantaceae     | <i>Calathea</i>     | <i>zebrina</i>                   | OL536792 | OL689910 | OL312094 | OL536394 |
| AI4GU47 | <a href="#">Carlsen 3256</a> | Marantaceae     | <i>Marantochloa</i> | <i>leucantha</i>                 | OL536989 | OL690061 | OL312148 | OL536557 |
| AI4GW09 | <a href="#">Carlsen 3313</a> | Marantaceae     | <i>Stromanthe</i>   | <i>tonckat</i>                   | OL537133 | OL690179 |          | OL536674 |
| AI4GR27 | <a href="#">Carlsen 3082</a> | Marantaceae     | <i>Stromanthe</i>   | <i>thalia</i>                    | OL537132 | OL690178 | OL312081 | OL536673 |
| AI4GW70 | <a href="#">Carlsen 3337</a> | Marantaceae     | <i>Thalia</i>       | <i>geniculata</i>                | OL537144 |          | OL312213 | OL536684 |
| AI4GX14 | <a href="#">Carlsen 3359</a> | Marcgraviaceae  | <i>Norantea</i>     | <i>guianensis</i>                | OL537012 | OL690082 | OL312229 | OL536577 |
| AI4GX46 | <a href="#">Carlsen 3375</a> | Marcgraviaceae  | <i>Marcgravia</i>   | <i>rectiflora</i>                | OL536990 | OL690062 | OL312155 | OL536558 |
| AI4GR99 | <a href="#">Carlsen 3052</a> | Melastomataceae | <i>Calvoa</i>       | <i>orientalis</i>                | MH748839 |          | MH749334 | MT358282 |



|         |                              |                 |                       |                        |          |          |          |          |
|---------|------------------------------|-----------------|-----------------------|------------------------|----------|----------|----------|----------|
| AI4GR88 | <a href="#">Carlsen 3056</a> | Melastomataceae | <i>Centradenia</i>    | <i>sp.</i>             | MH748840 |          | MT441729 | MH762931 |
| AI4GX18 | <a href="#">Carlsen 3361</a> | Melastomataceae | <i>Medinilla</i>      | <i>crassifolia</i>     | OL536993 |          | OL312231 | OL536561 |
| AI4GX64 | <a href="#">Carlsen 3383</a> | Melastomataceae | <i>Arthrostemma</i>   | <i>parvifolium</i>     | OL536756 |          | OL312163 | OL536368 |
| AL5LS13 | <a href="#">Carlsen 3545</a> | Melastomataceae | <i>Medinilla</i>      | <i>magnifica</i>       |          |          |          | OL536562 |
| AI4GU76 | <a href="#">Carlsen 3219</a> | Meliaceae       | <i>Trichilia</i>      | <i>sp.</i>             | OL537152 | OL690192 | OL312271 | OL536689 |
| AL5LR73 | <a href="#">Carlsen 3525</a> | Meliaceae       | <i>Azadirachta</i>    | <i>indica</i>          | OL536765 | OL689889 | OL312484 | OL536374 |
| AI4GR03 | <a href="#">Carlsen 3058</a> | Menispermaceae  | <i>Chondrodendron</i> | <i>tomentosum</i>      | MH748841 | MT362750 | MH749335 | MT358283 |
| AI4GT35 | <a href="#">Carlsen 3143</a> | Menyanthaceae   | <i>Ornduffia</i>      | <i>albiflora</i>       | OL537018 | OL690086 | OL312111 | OL536583 |
| AI4GX97 | <a href="#">Carlsen 3452</a> | Montiaceae      | <i>Calandrinia</i>    | <i>crassifolia</i>     | OL536791 | OL689909 | OL312451 | OL536393 |
| AI4GX44 | <a href="#">Carlsen 3374</a> | Moraceae        | <i>Ficus</i>          | <i>sycomorus</i>       | OL536904 | OL689994 | OL312154 | OL536486 |
| AI4GT93 | <a href="#">Carlsen 3108</a> | Moraceae        | <i>Dorstenia</i>      | <i>contrajerva</i>     | OL536875 | OL689970 | OL312302 | OL536460 |
| AI4GV76 | <a href="#">Carlsen 3290</a> | Moraceae        | <i>Ficus</i>          | <i>carica</i>          | OL536903 | OL689993 | OL312325 | OL536485 |
| AL5LR87 | <a href="#">Carlsen 3529</a> | Moraceae        | <i>Trophis</i>        | <i>montana</i>         | OL537155 | OL690194 |          | OL536692 |
| AL5LR81 | <a href="#">Carlsen 3533</a> | Moraceae        | <i>Trilepisium</i>    | <i>madagascariense</i> | OL537154 | OL690193 | OL312488 | OL536691 |
| AL5LR77 | <a href="#">Carlsen 3520</a> | Moraceae        | <i>Streblus</i>       | <i>dimepate</i>        | OL537131 | OL690177 |          | OL536672 |
| AI4GW62 | <a href="#">Carlsen 3333</a> | Myrtaceae       | <i>Eugenia</i>        | <i>sp.</i>             | OL536897 | OL689987 | OL312209 | OL536480 |
| AI4GU84 | <a href="#">Carlsen 3227</a> | Myrtaceae       | <i>Psidium</i>        | <i>guajava</i>         | OL537072 | OL690131 | OL312278 | OL536626 |
| AI4GR86 | <a href="#">Carlsen 3084</a> | Myrtaceae       | <i>Plinia</i>         | <i>cauliflora</i>      | OL537062 | OL690122 |          | OL536619 |
| AI4GU48 | <a href="#">Carlsen 3255</a> | Myrtaceae       | <i>Pimenta</i>        | <i>dioica</i>          | OL537049 | OL690114 | OL312147 | OL536609 |
| AI4GU50 | <a href="#">Carlsen 3253</a> | Myrtaceae       | <i>Melaleuca</i>      | <i>linariifolia</i>    | OL536994 | OL690064 | OL312145 | OL536563 |
| AI4GT53 | <a href="#">Carlsen 3135</a> | Myrtaceae       | <i>Syzygium</i>       | <i>jambos</i>          | OL537137 | OL690183 | OL312321 | OL536678 |
| AI4GT15 | <a href="#">Carlsen 3153</a> | Myrtaceae       | <i>Melaleuca</i>      | <i>viridiflora</i>     | OL536995 | OL690065 | OL312120 | OL536564 |
| AI4GY31 | <a href="#">Carlsen 3442</a> | Myrtaceae       | <i>Beaufortia</i>     | <i>sparsa</i>          | OL536772 | OL689894 | OL312448 | OL536378 |
| AI4GX48 | <a href="#">Carlsen 3376</a> | Nyctaginaceae   | <i>Pisonia</i>        | <i>umbellifera</i>     | OL537054 | OL690117 |          | OL536613 |
| AI4GR11 | <a href="#">Carlsen 3085</a> | Ochnaceae       | <i>Ochna</i>          | <i>serrulata</i>       | OL537013 |          | OL312084 | OL536578 |
| AI4GU79 | <a href="#">Carlsen 3222</a> | Oleaceae        | <i>Olea</i>           | <i>europaea</i>        | OL537016 | OL690085 | OL312273 | OL536581 |
| AI4GS91 | <a href="#">Carlsen 3165</a> | Oleaceae        | <i>Jasminum</i>       | <i>humile</i>          | OL536955 | OL690039 | OL312248 | OL536527 |
| AI4GU53 | <a href="#">Carlsen 3250</a> | Oleaceae        | <i>Ligustrum</i>      | <i>lucidum</i>         | OL536974 | OL690051 | OL312142 | OL536543 |

|         |                              |                |                      |                       |          |          |          |          |
|---------|------------------------------|----------------|----------------------|-----------------------|----------|----------|----------|----------|
| AI4GV47 | <a href="#">Carlsen 3282</a> | Onagraceae     | <i>Oenothera</i>     | <i>riparia</i>        | OL537015 | OL690084 |          | OL536580 |
| AI4GT59 | <a href="#">Carlsen 3122</a> | Onagraceae     | <i>Fuchsia</i>       | <i>brevilobis</i>     | OL536906 | OL689996 |          | OL536487 |
| AL5LS03 | <a href="#">Carlsen 3541</a> | Onagraceae     | <i>Hauya</i>         | <i>elegans</i>        |          |          |          | OL536502 |
| AI4GQ44 | <a href="#">Carlsen 3008</a> | Orchidaceae    | <i>Trichoceros</i>   | <i>antennifer</i>     |          | MH748896 | MT441724 | MH762942 |
| AG5NO65 | <a href="#">Carlsen 3014</a> | Orchidaceae    | <i>Promenaea</i>     | <i>rollissonii</i>    | MT358303 | MT362766 |          |          |
| AI4GQ85 | <a href="#">Carlsen 3017</a> | Orchidaceae    | <i>Jacquiniella</i>  | <i>equitantifolia</i> | MH748849 | MH748888 | MT441727 | MT358287 |
| AI4GQ79 | <a href="#">Carlsen 3020</a> | Orchidaceae    | <i>Neobenthamia</i>  | <i>gracilis</i>       | MH748853 | MH748893 |          | MT358292 |
| AI4GQ77 | <a href="#">Carlsen 3021</a> | Orchidaceae    | <i>Mormolyca</i>     | <i>ringens</i>        | MH748852 | MH748892 |          | MT358290 |
| AI4GQ81 | <a href="#">Carlsen 3019</a> | Orchidaceae    | <i>Ansellia</i>      | <i>africana</i>       | MH748844 | MH748884 |          | MT358280 |
| AI4GQ83 | <a href="#">Carlsen 3018</a> | Orchidaceae    | <i>Trichotisia</i>   | <i>barbarossa</i>     | MT358305 | MH748897 |          | MH762943 |
| AI4GQ65 | <a href="#">Carlsen 3028</a> | Orchidaceae    | <i>Micropera</i>     | <i>pallida</i>        | MT358301 | MH748891 |          | MT358289 |
| AG5NO67 | <a href="#">Carlsen 3016</a> | Orchidaceae    | <i>Scaphosepalum</i> | <i>breve</i>          | MH748855 | MT362768 |          | MH762940 |
| AI4GQ75 | <a href="#">Carlsen 3023</a> | Orchidaceae    | <i>Vandopsis</i>     | <i>lissochiloides</i> | MT359249 | MH748898 | MT441726 |          |
| AI4GQ39 | <a href="#">Carlsen 3012</a> | Orchidaceae    | <i>Cymbidium</i>     | <i>aloifolium</i>     | MH748846 | MT362754 |          | MT358284 |
| AG5NO59 | <a href="#">Carlsen 3011</a> | Orchidaceae    | <i>Restrepia</i>     | <i>brachypus</i>      | MH748854 | MT359250 |          | MH762939 |
| AI4GU86 | <a href="#">Carlsen 3213</a> | Orchidaceae    | <i>Dendrobium</i>    | <i>sp.</i>            | OL536856 | OL354143 | OL312266 | OL536445 |
| AI4GS27 | <a href="#">Carlsen 3199</a> | Orchidaceae    | <i>Epidendrum</i>    | <i>ibaguense</i>      | OL536889 | OL689980 |          | OL536473 |
| AI4GU46 | <a href="#">Carlsen 3257</a> | Orchidaceae    | <i>Sobralia</i>      | <i>macrantha</i>      | OL537120 | OL690167 | OL312149 | OL536664 |
| AI4GX52 | <a href="#">Carlsen 3378</a> | Orchidaceae    | <i>Ludisia</i>       | <i>discolor</i>       | OL536978 | OL690055 | OL312157 | OL536547 |
| AI4GV27 | <a href="#">Carlsen 3265</a> | Oxalidaceae    | <i>Averrhoa</i>      | <i>carambola</i>      | OL536763 | OL689887 | OL312190 | OL536372 |
| AL5LS23 | <a href="#">Carlsen 3550</a> | Oxalidaceae    | <i>Biophytum</i>     | <i>sensitivum</i>     | OL536778 | OL689899 | OL312396 | OL536383 |
| AI4GX34 | <a href="#">Carlsen 3369</a> | Pandanaceae    | <i>Pandanus</i>      | <i>copelandii</i>     | OL537030 | OL690098 | OL312239 |          |
| AI4GS21 | <a href="#">Carlsen 3204</a> | Pandanaceae    | <i>Freycinetia</i>   | <i>cumingiana</i>     | OL536905 | OL689995 |          |          |
| AI4GT09 | <a href="#">Carlsen 3156</a> | Papaveraceae   | <i>Eomecon</i>       | <i>chionantha</i>     | OL536888 | OL689979 | OL312123 | OL536472 |
| AI4GV81 | <a href="#">Carlsen 3295</a> | Papaveraceae   | <i>Argemone</i>      | <i>pleiacantha</i>    | OL536752 | OL689879 | OL312330 | OL536364 |
| AI4GU58 | <a href="#">Carlsen 3239</a> | Papaveraceae   | <i>Lamprocapnos</i>  | <i>spectabilis</i>    | OL536968 | OL690047 | OL312137 | OL536537 |
| AL5LR35 | <a href="#">Carlsen 3504</a> | Papaveraceae   | <i>Bocconia</i>      | <i>frutescens</i>     | OL536782 | OL689901 | OL312379 | OL536385 |
| AI4GU17 | <a href="#">Carlsen 3104</a> | Passifloraceae | <i>Passiflora</i>    | <i>vitifolia</i>      | OL537035 | OL690103 | OL312103 | OL536597 |

|         |                              |                  |                       |                        |          |          |          |          |
|---------|------------------------------|------------------|-----------------------|------------------------|----------|----------|----------|----------|
| AI4GV69 | <a href="#">Carlsen 3286</a> | Passifloraceae   | <i>Passiflora</i>     | <i>citrina</i>         | OL537034 | OL690102 | OL312207 | OL536596 |
| AI4GR51 | <a href="#">Carlsen 3100</a> | Passifloraceae   | <i>Passiflora</i>     | <i>yucatanensis</i>    | OL537036 | OL690104 | OL312099 | OL536598 |
| AI4GV82 | <a href="#">Carlsen 3296</a> | Pedaliaceae      | <i>Uncarina</i>       | <i>grandidieri</i>     | OL537156 | OL690195 | OL312331 | OL536693 |
| AL5LR29 | <a href="#">Carlsen 3494</a> | Pentaphylacaceae | <i>Cleyera</i>        | <i>japonica</i>        | OL536824 | OL689934 |          | OL536420 |
| AL5LR31 | <a href="#">Carlsen 3506</a> | Philesiaceae     | <i>Geitonoplesium</i> | <i>cymosum</i>         | OL536911 | OL690001 | OL312475 | OL536492 |
| AI4GV49 | <a href="#">Carlsen 3279</a> | Philydraceae     | <i>Philydrum</i>      | <i>lanuginosum</i>     | OL537044 | OL690111 | OL312202 | OL536606 |
| AI4GQ69 | <a href="#">Carlsen 3026</a> | Phyllanthaceae   | <i>Breynia</i>        | <i>disticha</i>        | MH748857 | MT362749 | MH749338 | MH762944 |
| AI4GS22 | <a href="#">Carlsen 3203</a> | Phytolaccaceae   | <i>Rivina</i>         | <i>humilis</i>         | OL537091 | OL690143 | OL312185 | OL536638 |
| AI4GS95 | <a href="#">Carlsen 3161</a> | Pinaceae         | <i>Pinus</i>          | <i>pinea</i>           | OL537052 |          | OL312247 |          |
| AI4GU19 | <a href="#">Carlsen 3105</a> | Piperaceae       | <i>Peperomia</i>      | <i>trinervis</i>       | OL537040 |          | OL312167 | OL536602 |
| AI4GU05 | <a href="#">Carlsen 3114</a> | Piperaceae       | <i>Piper</i>          | <i>jacquemontianum</i> | OL537053 |          | OL312171 | OL536612 |
| AI4GS65 | <a href="#">Carlsen 3179</a> | Pittosporaceae   | <i>Billardiera</i>    | <i>cymosa</i>          | OL536776 | OL689897 | OL312259 | OL536382 |
| AL5LQ17 | <a href="#">Carlsen 3406</a> | Pittosporaceae   | <i>Pittosporum</i>    | <i>sp.</i>             | OL537058 | OL690119 | OL312357 | OL536615 |
| AL5LQ01 | <a href="#">Carlsen 3403</a> | Pittosporaceae   | <i>Pittosporum</i>    | <i>tobira</i>          | OL537059 | OL690120 | OL312354 | OL536616 |
| AI4GV83 | <a href="#">Carlsen 3297</a> | Plantaginaceae   | <i>Globularia</i>     | <i>sarcophylla</i>     | OL536914 | OL690002 | OL312332 | OL536494 |
| AI4GS73 | <a href="#">Carlsen 3174</a> | Plantaginaceae   | <i>Antirrhinum</i>    | <i>latifolium</i>      | OL536747 | OL689876 | OL312254 | OL536360 |
| AL5LQ51 | <a href="#">Carlsen 3467</a> | Plantaginaceae   | <i>Sairocarpus</i>    | <i>virga</i>           | OL537098 | OL690149 | OL312457 | OL536644 |
| AL5LQ61 | <a href="#">Carlsen 3472</a> | Plantaginaceae   | <i>Plantago</i>       | <i>arborescens</i>     | OL537061 |          | OL312462 | OL536618 |
| AI4GS99 | <a href="#">Carlsen 3159</a> | Plumbaginaceae   | <i>Limonium</i>       | <i>preauxii</i>        | OL536975 | OL690052 | OL312245 | OL536544 |
| AI4GX93 | <a href="#">Carlsen 3454</a> | Plumbaginaceae   | <i>Ceratostigma</i>   | <i>abyssinicum</i>     |          |          | OL312362 | OL536406 |
| AI4GS07 | <a href="#">Carlsen 3047</a> | Poaceae          | <i>Pharus</i>         | <i>latifolius</i>      |          | MH748901 | MH749341 | MT358293 |
| AI4GQ53 | <a href="#">Carlsen 3031</a> | Poaceae          | <i>Lithachne</i>      | <i>pauciflora</i>      | MT358300 |          |          |          |
| AI4GW24 | <a href="#">Carlsen 3320</a> | Poaceae          | <i>Setaria</i>        | <i>palmifolia</i>      | OL537115 | OL690163 | OL312347 | OL536659 |
| AL5LS93 | <a href="#">Carlsen 3588</a> | Poaceae          | <i>Otatea</i>         | <i>acuminata</i>       | OL537023 | OL690092 | OL312419 |          |
| AL5LQ71 | <a href="#">Carlsen 3477</a> | Poaceae          | <i>Muhlenbergia</i>   | <i>rigens</i>          |          | OL690072 |          | OL536570 |
| AL5LS07 | <a href="#">Carlsen 3542</a> | Podocarpaceae    | <i>Afrocarpus</i>     | <i>falcatus</i>        |          |          | OL312393 | OL536345 |
| AI4GX38 | <a href="#">Carlsen 3372</a> | Polypodiaceae    | <i>Phymatosorus</i>   | <i>scolopendria</i>    | OL537047 |          | OL312240 |          |
| AI4GV59 | <a href="#">Carlsen 3275</a> | Polypodiaceae    | <i>Drynaria</i>       | <i>sp.</i>             | OL536880 |          |          |          |

|         |                              |                |                       |                      |          |          |          |          |
|---------|------------------------------|----------------|-----------------------|----------------------|----------|----------|----------|----------|
| AI4GU49 | <a href="#">Carlsen 3254</a> | Polypodiaceae  | <i>Microsorium</i>    | <i>punctatum</i>     | OL536999 |          | OL312146 |          |
| AI4GX02 | <a href="#">Carlsen 3354</a> | Polypodiaceae  | <i>Pyrrosia</i>       | <i>rupestris</i>     | OL537079 |          |          |          |
| AL5LS49 | <a href="#">Carlsen 3563</a> | Polypodiaceae  | <i>Goniophlebium</i>  | <i>persicifolium</i> | OL536917 |          | OL312405 |          |
| AL5LS91 | <a href="#">Carlsen 3573</a> | Polypodiaceae  | <i>Pseudodrynaria</i> | <i>coronans</i>      | OL537069 |          | OL312412 |          |
| AL5LS33 | <a href="#">Carlsen 3555</a> | Polypodiaceae  | <i>Phymatosorus</i>   | <i>scolopendria</i>  | OL537046 |          | OL312400 |          |
| AL5LS95 | <a href="#">Carlsen 3582</a> | Polypodiaceae  | <i>Aglaomorpha</i>    | <i>meyeniana</i>     | OL536732 |          |          |          |
| AI4GU52 | <a href="#">Carlsen 3251</a> | Pontederiaceae | <i>Pontederia</i>     | <i>cordata</i>       | OL537065 | OL690125 | OL312143 | OL536622 |
| AI4GS33 | <a href="#">Carlsen 3194</a> | Primulaceae    | <i>Cyclamen</i>       | <i>persicum</i>      | OL536843 | OL689947 | OL312180 | OL536436 |
| AI4GU68 | <a href="#">Carlsen 3235</a> | Primulaceae    | <i>Dodecatheon</i>    | <i>meadia</i>        | OL536872 | OL689967 | OL312286 | OL536457 |
| AI4GT21 | <a href="#">Carlsen 3150</a> | Primulaceae    | <i>Myrsine</i>        | <i>africana</i>      | OL537004 | OL690074 | OL312117 | OL536572 |
| AL5LR85 | <a href="#">Carlsen 3531</a> | Primulaceae    | <i>Oncostemum</i>     | <i>sp.</i>           | OL537017 |          |          | OL536582 |
| AL5LS39 | <a href="#">Carlsen 3559</a> | Primulaceae    | <i>Jacquinia</i>      | <i>sp.</i>           | OL536954 | OL690038 | OL312403 |          |
| AL5LQ35 | <a href="#">Carlsen 3459</a> | Proteaceae     | <i>Hakea</i>          | <i>trineura</i>      | OL536922 | OL690008 | OL312364 | OL536500 |
| AI4GY29 | <a href="#">Carlsen 3441</a> | Proteaceae     | <i>Banksia</i>        | <i>oblongifolia</i>  | OL536769 | OL689893 | OL312447 | OL536377 |
| AI4GW90 | <a href="#">Carlsen 3347</a> | Psilotaceae    | <i>Psilotum</i>       | <i>nudum</i>         | OL537073 |          | OL312221 |          |
| AI4GW88 | <a href="#">Carlsen 3346</a> | Pteridaceae    | <i>Acrostichum</i>    | <i>aureum</i>        | OL536716 |          | OL312220 | OL536335 |
| AI4GW86 | <a href="#">Carlsen 3345</a> | Pteridaceae    | <i>Adiantum</i>       | <i>peruvianum</i>    | OL536721 |          |          |          |
| AI4GW46 | <a href="#">Carlsen 3325</a> | Pteridaceae    | <i>Pteris</i>         | <i>vittata</i>       | OL537076 |          | OL312351 |          |
| AL5LR17 | <a href="#">Carlsen 3445</a> | Pteridaceae    | <i>Adiantum</i>       | <i>hispidulum</i>    | OL536720 |          | OL312360 |          |
| AL5LR69 | <a href="#">Carlsen 3523</a> | Pteridaceae    | <i>Pteris</i>         | <i>sp.</i>           | OL537075 |          |          |          |
| AL5LQ95 | <a href="#">Carlsen 3489</a> | Restionaceae   | <i>Rhodocoma</i>      | <i>capensis</i>      | OL537085 | OL690138 | OL312471 |          |
| AI4GW84 | <a href="#">Carlsen 3344</a> | Rhamnaceae     | <i>Ziziphus</i>       | <i>spina-christi</i> | OL537175 | OL690208 | OL312219 | OL536710 |
| AL5LQ41 | <a href="#">Carlsen 3462</a> | Rhamnaceae     | <i>Sageretia</i>      | <i>minutiflora</i>   | OL537097 | OL690148 | OL312366 | OL536643 |
| AI4GT71 | <a href="#">Carlsen 3128</a> | Rhizophoraceae | <i>Rhizophora</i>     | <i>mangle</i>        | OL537084 |          |          | OL536632 |
| AI4GX30 | <a href="#">Carlsen 3367</a> | Rosaceae       | <i>Eriobotrya</i>     | <i>japonica</i>      | OL536892 | OL689983 | OL312237 | OL536476 |
| AI4GU77 | <a href="#">Carlsen 3220</a> | Rosaceae       | <i>Cotoneaster</i>    | <i>zabelii</i>       | OL536835 | OL689942 | OL312272 |          |
| AI4GT45 | <a href="#">Carlsen 3138</a> | Rosaceae       | <i>Prunus</i>         | <i>caroliniana</i>   | OL537068 | OL690128 | OL312106 | OL536624 |
| AI4GU66 | <a href="#">Carlsen 3237</a> | Rosaceae       | <i>Waldsteinia</i>    | <i>fragarioides</i>  | OL537161 |          | OL312288 | OL536697 |

|         |                               |                |                      |                      |          |          |          |          |
|---------|-------------------------------|----------------|----------------------|----------------------|----------|----------|----------|----------|
| AI4GR85 | <a href="#">Carlsen 3079</a>  | Rubiaceae      | <i>Arachnothryx</i>  | <i>leucophylla</i>   | MH748860 | MT362747 | MH749342 | MH762947 |
| AI4GX54 | <a href="#">Carlsen 3379</a>  | Rubiaceae      | <i>Hydnophytum</i>   | <i>formicarum</i>    | OL536943 | OL690027 | OL312158 | OL536518 |
| AI4GV97 | <a href="#">Carlsen 3307</a>  | Rubiaceae      | <i>Coffea</i>        | <i>arabica</i>       | OL536829 | OL689937 | OL312338 | OL536424 |
| AI4GX56 | <a href="#">Carlsen 3380</a>  | Rubiaceae      | <i>Deppea</i>        | <i>splendens</i>     | OL536857 | OL689958 | OL312159 | OL536446 |
| AI4GX57 | <a href="#">Carlsen 3380b</a> | Rubiaceae      | <i>Deppea</i>        | <i>splendens</i>     | OL536858 | OL689959 | OL312160 | OL536447 |
| AI4GX26 | <a href="#">Carlsen 3364</a>  | Rubiaceae      | <i>Exostema</i>      | <i>lineatum</i>      | OL536901 | OL689991 | OL312234 | OL536484 |
| AI4GV86 | <a href="#">Carlsen 3300</a>  | Rubiaceae      | <i>Adina</i>         | <i>rubella</i>       | OL536722 | OL689857 |          | OL536339 |
| AI4GT29 | <a href="#">Carlsen 3146</a>  | Rubiaceae      | <i>Psychotria</i>    | <i>kirkii</i>        | OL537074 | OL690132 | OL312114 | OL536627 |
| AI4GW68 | <a href="#">Carlsen 3336</a>  | Rubiaceae      | <i>Hoffmannia</i>    | <i>ghiesbreghtii</i> | OL536938 | OL690022 | OL312212 | OL536513 |
| AI4GT25 | <a href="#">Carlsen 3148</a>  | Rubiaceae      | <i>Gardenia</i>      | <i>jasminoides</i>   | OL536908 | OL689998 | OL312115 | OL536489 |
| AI4GW30 | <a href="#">Carlsen 3323</a>  | Rubiaceae      | <i>Ixora</i>         | <i>masoalensis</i>   | OL536953 | OL690037 | OL312350 | OL536526 |
| AL5LT25 | <a href="#">Carlsen 3599</a>  | Rubiaceae      | <i>Chione</i>        | <i>venosa</i>        | OL536816 | OL689929 | OL312428 | OL536413 |
| AL5LS35 | <a href="#">Carlsen 3556</a>  | Rubiaceae      | <i>Atractocarpus</i> | <i>fitzalanii</i>    | OL536762 | OL689886 | OL312401 | OL536371 |
| AI4GU67 | <a href="#">Carlsen 3236</a>  | Ruscaceae      | <i>Maianthemum</i>   | <i>stellatum</i>     | OL536985 | OL690058 | OL312287 | OL536555 |
| AI4GY07 | <a href="#">Carlsen 3430</a>  | Rutaceae       | <i>Cneorum</i>       | <i>tricoccon</i>     | OL536827 |          | OL312437 | OL536422 |
| AL5LS43 | <a href="#">Carlsen 3560</a>  | Rutaceae       | <i>Citropsis</i>     | <i>gabunensis</i>    | OL536821 | OL689931 | OL312404 | OL536417 |
| AL5LS19 | <a href="#">Carlsen 3549</a>  | Rutaceae       | <i>Murraya</i>       | <i>koenigii</i>      | OL537003 | OL690073 | OL312496 | OL536571 |
| AI4GU60 | <a href="#">Carlsen 3241</a>  | Salicaceae     | <i>Dovyalis</i>      | <i>caffra</i>        | OL536876 | OL689971 | OL312289 | OL536461 |
| AI4GX32 | <a href="#">Carlsen 3368</a>  | Salicaceae     | <i>Xylosma</i>       | <i>congesta</i>      | OL537167 | OL690204 | OL312238 | OL536703 |
| AI4GU57 | <a href="#">Carlsen 3238</a>  | Sapindaceae    | <i>Xanthoceras</i>   | <i>sorbifolium</i>   | OL537163 | OL690201 | OL312136 | OL536699 |
| AL5LQ73 | <a href="#">Carlsen 3478</a>  | Sapindaceae    | <i>Aesculus</i>      | <i>californica</i>   | OL536728 | OL689862 | OL312466 | OL536343 |
| AL5LS59 | <a href="#">Carlsen 3568</a>  | Sapindaceae    | <i>Macphersonia</i>  | <i>sp.</i>           |          |          |          | OL536554 |
| AL5LR11 | <a href="#">Carlsen 3502</a>  | Sapotaceae     | <i>Argania</i>       | <i>spinosa</i>       | OL536751 | OL689878 | OL312377 | OL536363 |
| AL5LT20 | <a href="#">Carlsen 3577</a>  | Sapotaceae     | <i>Niemeyera</i>     | <i>whitei</i>        | OL537011 | OL690081 |          | OL536576 |
| AL5LS53 | <a href="#">Carlsen 3565</a>  | Sarcolaenaceae | <i>Xyloolaena</i>    | <i>richardii</i>     | OL537166 |          | OL312407 | OL536702 |
| AI4GU75 | <a href="#">Carlsen 3218</a>  | Sarraceniaceae | <i>Sarracenia</i>    | <i>alata</i>         | OL537104 | OL690154 | OL312270 | OL536649 |
| AI4GU69 | <a href="#">Carlsen 3234</a>  | Saxifragaceae  | <i>Mitella</i>       | <i>diphylla</i>      | OL537001 | OL690070 | OL312285 | OL536569 |
| AI4GS35 | <a href="#">Carlsen 3193</a>  | Saxifragaceae  | <i>Saxifraga</i>     | <i>stolonifera</i>   | OL537106 | OL690156 | OL312179 | OL536651 |



|         |                              |                   |                       |                        |          |          |          |          |
|---------|------------------------------|-------------------|-----------------------|------------------------|----------|----------|----------|----------|
| AI4GV51 | <a href="#">Carlsen 3278</a> | Schisandraceae    | <i>Illicium</i>       | <i>parviflorum</i>     | OL536949 | OL690033 | OL312201 | OL536522 |
| AL5LS77 | <a href="#">Carlsen 3586</a> | Schizaeaceae      | <i>Lygodium</i>       | <i>sp.</i>             | OL536982 |          | OL312418 | OL536551 |
| AL5LR14 | <a href="#">Carlsen 3444</a> | Schizaeaceae      | <i>Lygodium</i>       | <i>japonicum</i>       | OL536981 |          | OL312359 | OL536550 |
| AI4GS59 | <a href="#">Carlsen 3180</a> | Scrophulariaceae  | <i>Hebenstretia</i>   | <i>dentata</i>         | OL536927 | OL690013 | OL312260 | OL536503 |
| AI4GX40 | <a href="#">Carlsen 3370</a> | Scrophulariaceae  | <i>Buddleja</i>       | <i>indica</i>          | OL536786 | OL689905 | OL312152 | OL536389 |
| AI4GX87 | <a href="#">Carlsen 3457</a> | Scrophulariaceae  | <i>Scrophularia</i>   | <i>hierochuntina</i>   | OL537109 | OL690158 |          |          |
| AI4GX05 | <a href="#">Carlsen 3356</a> | Selaginellaceae   | <i>Selaginella</i>    | <i>pallescens</i>      | OL537111 |          | OL312226 | OL536655 |
| AI4GT05 | <a href="#">Carlsen 3163</a> | Solanaceae        | <i>Salpichroa</i>     | <i>origanifolia</i>    | OL537099 | OL690150 | OL312127 | OL536645 |
| AI4GU09 | <a href="#">Carlsen 3106</a> | Solanaceae        | <i>Brunfelsia</i>     | <i>americana</i>       | OL536785 | OL689904 | OL312168 | OL536388 |
| AI4GT63 | <a href="#">Carlsen 3124</a> | Solanaceae        | <i>Juanulloa</i>      | <i>mexicana</i>        | OL536957 | OL690040 | OL312311 | OL536529 |
| AI4GS63 | <a href="#">Carlsen 3178</a> | Solanaceae        | <i>Hyoscyamus</i>     | <i>aureus</i>          | OL536948 | OL690032 | OL312258 | OL536521 |
| AL5LR97 | <a href="#">Carlsen 3537</a> | Sphaerosepalaceae | <i>Rhopalocarpus</i>  | <i>longipetiolatus</i> | OL537087 | OL690140 | OL312492 | OL536634 |
| AL5LQ77 | <a href="#">Carlsen 3480</a> | Stylidiaceae      | <i>Stylidium</i>      | <i>glandulosum</i>     | OL537135 | OL690181 | OL312467 | OL536676 |
| AL5LQ27 | <a href="#">Carlsen 3411</a> | Styracaceae       | <i>Styrax</i>         | <i>officinalis</i>     | OL537136 | OL690182 | OL312433 | OL536677 |
| AI4GR63 | <a href="#">Carlsen 3073</a> | Taccaceae         | <i>Tacca</i>          | <i>chantrieri</i>      | MH748829 | MT362770 | MH749327 |          |
| AL5LR21 | <a href="#">Carlsen 3498</a> | Thelypteridaceae  | <i>Thelypteris</i>    | <i>kunthii</i>         | OL537145 |          | OL312375 |          |
| AL5LR49 | <a href="#">Carlsen 3512</a> | Thelypteridaceae  | <i>Christella</i>     | <i>dentata</i>         | OL536818 |          | OL312384 |          |
| AI4GQ51 | <a href="#">Carlsen 3035</a> | Urticaceae        | <i>Pellionia</i>      | <i>repens</i>          | MT358302 | MT362764 | MH749346 | MH762951 |
| AI4GW92 | <a href="#">Carlsen 3348</a> | Urticaceae        | <i>Pilea</i>          | <i>cadieri</i>         | OL537048 | OL690113 | OL312222 | OL536608 |
| AI4GY23 | <a href="#">Carlsen 3438</a> | Urticaceae        | <i>Boehmeria</i>      | <i>biloba</i>          | OL536783 | OL689902 | OL312444 | OL536386 |
| AI4GV67 | <a href="#">Carlsen 3285</a> | Velloziaceae      | <i>Barbacenia</i>     | <i>purpurea</i>        | OL536771 |          | OL312206 |          |
| AL5LR55 | <a href="#">Carlsen 3505</a> | Velloziaceae      | <i>Barbacenia</i>     | <i>brasiliensis</i>    | OL536770 |          | OL312380 |          |
| AI4GS14 | <a href="#">Carlsen 3211</a> | Verbenaceae       | <i>Duranta</i>        | <i>sp.</i>             | OL536882 | OL689975 | OL312134 | OL536466 |
| AI4GS16 | <a href="#">Carlsen 3212</a> | Verbenaceae       | <i>Stachytarpheta</i> | <i>jamaicensis</i>     | OL537127 | OL690174 | OL312135 | OL536671 |
| AI4GS12 | <a href="#">Carlsen 3210</a> | Verbenaceae       | <i>Lantana</i>        | <i>achyranthifolia</i> | OL536969 | OL690048 | OL312133 | OL536538 |
| AL5LS37 | <a href="#">Carlsen 3557</a> | Vitaceae          | <i>Leea</i>           | <i>rubra</i>           | OL536970 | OL690049 | OL312402 | OL536539 |
| AL5LQ49 | <a href="#">Carlsen 3466</a> | Xanthorrhoeaceae  | <i>Xanthorrhoea</i>   | <i>macronema</i>       | OL537164 | OL690202 | OL312456 | OL536700 |
| AL5LQ45 | <a href="#">Carlsen 3464</a> | Xanthorrhoeaceae  | <i>Dianella</i>       | <i>nigra</i>           | OL536859 | OL689960 | OL312455 |          |

|         |                              |               |                        |                     |          |  |          |          |
|---------|------------------------------|---------------|------------------------|---------------------|----------|--|----------|----------|
| AI4GW44 | <a href="#">Carlsen 3324</a> | Xyridaceae    | <i>Xyris</i>           | <i>fimbriata</i>    | OL537168 |  |          |          |
| AI4GT99 | <a href="#">Carlsen 3111</a> | Zamiaceae     | <i>Ceratozamia</i>     | <i>hildae</i>       | OL536807 |  | OL312305 | OL536407 |
| AI4GW94 | <a href="#">Carlsen 3349</a> | Zamiaceae     | <i>Encephalartos</i>   | <i>ferox</i>        | OL536887 |  | OL312223 | OL536471 |
| AL5LS97 | <a href="#">Carlsen 3590</a> | Zamiaceae     | <i>Stangeria</i>       | <i>eriopus</i>      | OL537128 |  | OL312421 |          |
| AL5LS87 | <a href="#">Carlsen 3575</a> | Zamiaceae     | <i>Lepidozamia</i>     | <i>hopei</i>        | OL536971 |  | OL312414 | OL536540 |
| AL5LS27 | <a href="#">Carlsen 3552</a> | Zamiaceae     | <i>Dioon</i>           | <i>edule</i>        | OL536865 |  | OL312398 | OL536452 |
| AI4GV53 | <a href="#">Carlsen 3271</a> | Zingiberaceae | <i>Etlingera</i>       | <i>elator</i>       | OL536894 |  | OL312195 | OL536478 |
| AI4GW60 | <a href="#">Carlsen 3332</a> | Zingiberaceae | <i>Curcuma</i>         | <i>australasica</i> | OL536841 |  | OL312208 | OL536434 |
| AI4GS26 | <a href="#">Carlsen 3200</a> | Zingiberaceae | <i>Hedychium</i>       | <i>horsfieldii</i>  | OL536929 |  |          | OL536505 |
| AI4GV91 | <a href="#">Carlsen 3304</a> | Zingiberaceae | <i>Alpinia</i>         | <i>vittata</i>      | OL536740 |  | OL312296 | OL536355 |
| AI4GT57 | <a href="#">Carlsen 3121</a> | Zingiberaceae | <i>Distichochlamys</i> | <i>rubrostriata</i> | OL536871 |  | OL312310 | OL536456 |
| AI4GV21 | <a href="#">Carlsen 3262</a> | Zingiberaceae | <i>Kaempferia</i>      | <i>pulchra</i>      | OL536959 |  | OL312187 | OL536531 |
| AL5LS41 | <a href="#">Carlsen 3558</a> | Zingiberaceae | <i>Scaphochlamys</i>   | <i>biloba</i>       | OL537107 |  |          | OL536652 |
| AL5LS20 | <a href="#">Carlsen 3547</a> | Zingiberaceae | <i>Zingiber</i>        | <i>sp.</i>          | OL537174 |  |          | OL536709 |
| AL5LT23 | <a href="#">Carlsen 3597</a> | Zingiberaceae | <i>Aframomum</i>       | <i>melegueta</i>    | OL536729 |  |          | OL536344 |
| AL5LT22 | <a href="#">Carlsen 3596</a> | Zingiberaceae | <i>Elettaria</i>       | <i>cardamomum</i>   | OL536886 |  | OL312427 | OL536470 |
